# Supplementary material for: Standard maintenance therapy versus local consolidative radiation therapy and standard maintenance therapy in 1–5 sites of oligometastatic non-small cell lung cancer: a study protocol of phase III randomised controlled trial
Source: PubMed Central journal article supplement — BMJ Open. 2021 Mar 16;11(3):e043628. doi: 10.1136/bmjopen-2020-043628 (PMC7970230; doi:10.1136/bmjopen-2020-043628), 2021-03-16
Supplement: bmjopen-2020-043628.draft_revisions.pdf [file bmjopen-2020-043628.draft_revisions.pdf]

# BMJ Open

BMJ Open is committed to open peer review. As part of this commitment we make the peer review history of every article we publish publicly available.

When an article is published we post the peer reviewers' comments and the authors' responses online. We also post the versions of the paper that were used during peer review. These are the versions that the peer review comments apply to.

The versions of the paper that follow are the versions that were submitted during the peer review process. They are not the versions of record or the final published versions. They should not be cited or distributed as the published version of this manuscript.

BMJ Open is an open access journal and the full, final, typeset and author-corrected version of record of the manuscript is available on our site with no access controls, subscription charges or pay-per-view fees (<http://bmjopen.bmj.com>).

If you have any questions on BMJ Open's open peer review process please email [info.bmjopen@bmj.com](mailto:info.bmjopen@bmj.com)

# BMJ Open

## Standard Maintenance Therapy versus Local Consolidative Radiation Therapy and Standard Maintenance Therapy in 1-5 sites of Oligometastatic Non-Small Cell Lung Cancer: A Study Protocol of Phase III Randomized Controlled Trial

|                               |                                                                                                                                                                                                                                                                                                                                                                                                                                                                                                                                                                                                                                                    |
|-------------------------------|----------------------------------------------------------------------------------------------------------------------------------------------------------------------------------------------------------------------------------------------------------------------------------------------------------------------------------------------------------------------------------------------------------------------------------------------------------------------------------------------------------------------------------------------------------------------------------------------------------------------------------------------------|
| Journal:                      | <i>BMJ Open</i>                                                                                                                                                                                                                                                                                                                                                                                                                                                                                                                                                                                                                                    |
| Manuscript ID                 | bmjopen-2020-043628                                                                                                                                                                                                                                                                                                                                                                                                                                                                                                                                                                                                                                |
| Article Type:                 | Protocol                                                                                                                                                                                                                                                                                                                                                                                                                                                                                                                                                                                                                                           |
| Date Submitted by the Author: | 10-Aug-2020                                                                                                                                                                                                                                                                                                                                                                                                                                                                                                                                                                                                                                        |
| Complete List of Authors:     | Tibdewal, Anil; Tata Memorial Hospital, Radiation Oncology<br>Agarwal, JaiPrakash; Tata Memorial Hospital, Radiation Oncology<br>Srinivasan, Shashank; Tata Memorial Hospital, Radiation Oncology<br>Mummudi, Naveen; Tata Memorial Hospital, Radiation Oncology<br>Noronha, Vanita; Tata Memorial Hospital, Medical Oncology<br>Prabhash, Kumar; Tata Memorial Hospital, Medical Oncology<br>Patil, Vijay ; Tata Memorial Hospital, Medical Oncology<br>Purandare, Nilendu; Tata Memorial Hospital, Nuclear Medicine<br>Janu, Amit; Tata Memorial Centre, Radiodiagnosis<br>Kannan, Sadhna; Tata Memorial Hospital, Clinical Research Secretariat |
| Keywords:                     | Radiation oncology < RADIOTHERAPY, CHEMOTHERAPY, Respiratory tract tumours < THORACIC MEDICINE                                                                                                                                                                                                                                                                                                                                                                                                                                                                                                                                                     |
|                               |                                                                                                                                                                                                                                                                                                                                                                                                                                                                                                                                                                                                                                                    |

SCHOLARONE™  
Manuscripts

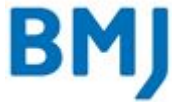

I, the Submitting Author has the right to grant and does grant on behalf of all authors of the Work (as defined in the below author licence), an exclusive licence and/or a non-exclusive licence for contributions from authors who are: i) UK Crown employees; ii) where BMJ has agreed a CC-BY licence shall apply, and/or iii) in accordance with the terms applicable for US Federal Government officers or employees acting as part of their official duties; on a worldwide, perpetual, irrevocable, royalty-free basis to BMJ Publishing Group Ltd ("BMJ") its licensees and where the relevant Journal is co-owned by BMJ to the co-owners of the Journal, to publish the Work in this journal and any other BMJ products and to exploit all rights, as set out in our [licence](#).

The Submitting Author accepts and understands that any supply made under these terms is made by BMJ to the Submitting Author unless you are acting as an employee on behalf of your employer or a postgraduate student of an affiliated institution which is paying any applicable article publishing charge ("APC") for Open Access articles. Where the Submitting Author wishes to make the Work available on an Open Access basis (and intends to pay the relevant APC), the terms of reuse of such Open Access shall be governed by a Creative Commons licence – details of these licences and which [Creative Commons](#) licence will apply to this Work are set out in our licence referred to above.

Other than as permitted in any relevant BMJ Author's Self Archiving Policies, I confirm this Work has not been accepted for publication elsewhere, is not being considered for publication elsewhere and does not duplicate material already published. I confirm all authors consent to publication of this Work and authorise the granting of this licence.

## Title Page

**Title: Standard Maintenance Therapy versus Local Consolidative Radiation Therapy and Standard Maintenance Therapy in 1-5 sites of Oligometastatic Non-Small Cell Lung Cancer: A Study Protocol of Phase III Randomized Controlled Trial**

**Authors:** Dr. Anil Tibdewal<sup>1\*</sup>, Dr. Jaiprakash Agarwal<sup>1</sup>, Dr. Shashank Srinivasan<sup>1</sup>, Dr. Naveen Mummudi<sup>1</sup>, Dr. Vanita Noronha<sup>2</sup>, Dr. Kumar Prabhash<sup>2</sup>, Dr. Vijay Patil<sup>2</sup>, Dr. Nilendu Purandare<sup>3</sup>, Dr. Amit Janu<sup>4</sup>, Dr. Sadhana Kannan<sup>5</sup>.

<sup>1</sup> Department of Radiation Oncology, Tata Memorial Hospital, Homi Bhabha National Institute, Mumbai, India.

<sup>2</sup> Department of Medical Oncology, Tata Memorial Hospital, Homi Bhabha National Institute, Mumbai, India.

<sup>3</sup> Department of Nuclear Medicine, Tata Memorial Hospital, Homi Bhabha National Institute, Mumbai, India.

<sup>4</sup> Department of Radiodiagnosis, Tata Memorial Hospital, Homi Bhabha National Institute, Mumbai, India.

<sup>5</sup> Clinical Research Secretariat, Tata Memorial Hospital, Homi Bhabha National Institute, Mumbai, India.

**\*Corresponding Author: Dr. Anil Tibdewal**

Assistant Professor,

Department of Radiation Oncology

Tata Memorial Centre, Mumbai, India

Email: [aniltibdewal@gmail.com](mailto:aniltibdewal@gmail.com)

Telephone: [91-22-2417 7030](tel:91-22-24177030)

## Abstract

**Introduction:** Two-phase II randomized studies have shown a significant benefit of local consolidation therapy in oligometastatic NSCLC. This phase III RCT will evaluate the efficacy of local consolidation radiation therapy in OM NSCLC after completion of initial systemic therapy.

**Methods and Analysis:** This is a single-center phase III randomized controlled trial of OM NSCLC patients. One hundred ninety patients will undergo 1:1 randomization to either standard maintenance therapy (Control Arm) or local consolidation radiation therapy and standard maintenance therapy (Experimental Arm). Patients will be stratified into the number of OM sites (1-2 vs 3-5), nodal metastases (N0-N1 vs N2-N3) and presence or absence of brain metastases. Stereotactic body radiation therapy (SBRT) to all the oligometastatic sites and definitive RT to primary disease will be given in the experimental arm. The primary endpoint is overall survival and secondary endpoints include progression-free survival, local control of OM sites, new distant metastases free survival, objective response rate, toxicity and quality of life. Translation endpoint include circulating tumor cells and radiomics using texture analysis.

**Ethics and Dissemination:** All patients will be provided with a written informed consent form which needs to be signed before randomization. The study is approved by the institutional ethics committee-II (project number 3445) and registered with Clinical Trials Registry – India, CTRI/2020/04/024761, dated April 21<sup>st</sup>, 2020.

**Keywords:** Local consolidation radiation therapy, Non-small cell lung cancer, Oligometastases, Stereotactic body radiation therapy, Quality of life.

## Article Summary

### Strengths and Limitations of this study

- Single Centre phase III study assessing role of local consolidation radiation therapy in oligometastatic (OM) NSCLC
- Randomization after initial systemic therapy with no progressive disease
- Practical eligibility criteria for timely recruitment
- SBRT to all oligometastatic sites
- Translational endpoints of circulating tumor cells and radiomics analysis

## Introduction

Systemic therapy is the standard of care for patients with metastatic non-small cell lung cancer (NSCLC). Tyrosine kinase inhibitors (TKI) have significantly improved survival outcomes for patients with an actionable oncogene mutation like epidermal growth factor receptor (EGFR) or anaplastic lymphoma kinase (ALK) [1–4]. In patients with programmed death/ ligand receptor (PD-1/PD-L1) expression, immune checkpoint inhibitors (ICI) also improves outcomes compared to systemic therapy alone [5,6]. Patients who do not have oncogene mutations and are not eligible for immunotherapy have a worse prognosis with median OS ranging from 10-13 months as compared to median OS of 18-26 months for patients treated with TKI or immunotherapy[4,6].

Metastatic NSCLC with limited sites of metastases referred to as oligometastases (OM) has shown better prognosis than those with widespread metastases[7,8]. The OM state was proposed as an intermediate stage of cancer with a spread between localized disease and widespread metastases[9,10]. The significance of the OM paradigm is that selected patients could be cured with radical local therapies[11]. There has been much debate as to the definition of oligometastatic disease in NSCLC. Recently, the European consensus definition for synchronous oligometastatic NSCLC was published. These include patients with a maximum of five metastatic lesions involving a maximum of three organs and all can be treated with radical local ablative therapy [12,13]. It is recommended not to consider histology and genomic background. (ref to be added).

The question remains why oligometastatic disease should behave differently than widespread metastatic disease. Patterns of failure analyses from limited metastatic NSCLC suggest that disease progression most often occurs at sites of existing disease at baseline rather than at new sites[14–16]. Hence, aggressive treatment of limited metastatic sites could potentially remove the dominant disease that could seed other sites in the future. Various retrospective studies have proven the role of definitive local therapy in oligometastases[17,18]. Two-phase II studies performed by Gomez et al. and Iyengar et al. showed that local consolidative therapy in addition to systemic therapy has a role in oligometastatic NSCLC. Gomez et al. randomized 1-3 sites of OM NSCLC patients to local consolidative therapy with or without maintenance therapy or to maintenance treatment alone. They showed a significant median PFS benefit in favor of local consolidative therapy (11.9 months vs 3.9 months,  $p=0.005$ ). Long term results

1  
2  
3 also showed an OS benefit of 41 months vs 17 months [19,20]. Iyengar et al. randomized 29  
4 patients to maintenance chemotherapy (CT) alone vs SABR followed by maintenance  
5 chemotherapy. As opposed to the study by Gomez et al. they enrolled patients with negative  
6 EGFR/ALK mutations and up to 5 metastatic sites. They showed a significant improvement in  
7 PFS with SABR (9.7 months vs 3.5 months,  $p=0.01$ ). The SINDAS trial is the only phase III  
8 randomized trial with results presented at the recent ASCO meeting. The study randomized  
9 patient with EGFR mutation and  $\leq 5$  OM sites to either TKI alone or SBRT plus TKIs. The  
10 study showed a significant median PFS (20.2 vs 12.5 months,  $p<0.001$ ) and OS (25.5 vs 17.4  
11 months,  $p<0.001$ ) respectively [21].  
12  
13  
14  
15  
16  
17  
18

19 Although there has been promising data for the addition of local consolidative therapy to  
20 standard systemic therapy for oligometastatic NSCLC, these studies remain nondefinitive as  
21 they included small patient numbers. The only reported phase III RCT has exclusively selected  
22 patients with EGFR mutation[21]. These patients have a different natural history and outcomes  
23 for those who do not have EGFR mutations [22]. Hence, we initiated a phase III RCT to  
24 ascertain the role of addition of local consolidative radiation therapy (LCRT) to standard  
25 maintenance therapy (SMT) in oligometastatic NSCLC patients with up to 5 metastatic lesions  
26 and negative oncogene mutations.  
27  
28  
29  
30  
31  
32  
33  
34

### 35 **Materials and Methods**

36 This study is designed as a single institution, open-label, phase-III RCT, approved by the  
37 institutional ethics committee-II (IEC-II) (project number 3445). All NSCLC patients with up  
38 to 5 metastatic sites at presentation will be screened for this study. Patients who have completed  
39 standard systemic therapy and response imaging shows no progressive disease (PD) as per  
40 Response Evaluation Criteria in Solid Tumors (RECIST) version 1.1 will be eligible for this  
41 study. If found eligible under eligibility criteria (Table 1), patients will be explained about the  
42 study protocol by the study investigators in their native language and interested patients will  
43 be given an IEC approved written informed consent document available in English, Hindi and  
44 Marathi language (Supplement file 1).  
45  
46  
47  
48  
49  
50  
51

52 Patients will be randomized in a 1:1 ratio to SMT alone (control arm), and LCRT + SMT  
53 (experimental arm). Patients will be stratified by the number of metastatic sites (1-2 vs 3-5),  
54 nodal metastases (N0-N1 vs N2), and brain metastases (present vs absent). Independent  
55 biostatistician of the institute will perform a computer-generated randomization sequence  
56 based on stratification factors.  
57  
58  
59  
60



## **Patient and Public involvement**

Patients or the public were not involved in the design, conduct, reporting, or dissemination plans of this study.

## **Objectives and Endpoints**

The primary objective of this study is to assess the efficacy of LCRT after initial systemic therapy in oligometastatic NSCLC patients.

### **Primary Endpoint**

To compare the overall survival (OS) between SMT arm and LCRT+ SMT arm where OS is defined as the time from the date of randomization to the date of death due to any cause.

### **Secondary Endpoints**

1. Progression-free survival (PFS) - the time from the date of randomization until the date of disease progression, or until death in the absence of progression, whichever is earlier.
2. Local control for sites treated with LCRT – defined as the absence of PD (complete response, partial response, or stable disease).
3. New distant metastases free survival (DMFS) - the time from the date of randomization until the emergence of new distant metastases or death, whichever is earlier.
4. Objective response rate (complete response [CR] + partial response [PR])
5. Patient-reported outcomes using the EORTC QOL core questionnaire (QLQ-C30) and the corresponding lung cancer module (QLQ-LC13)
6. Treatment-related toxicity assessed using National Cancer Institute Common Toxicity Criteria (NCI-CTC) version 5.

### **Exploratory endpoints**

1. Textural features of primary and metastatic sites using the TexRAD software (TexRAD Ltd. Cambridge UK)
2. Differences in the textural features between pre and post-treatment images in the experimental arm and their correlation with survival outcomes.

### 3. Correlation of circulating tumor cells (CTCs) with the survival outcomes.

**Table 1: Eligibility criteria for the study**

| <b>Inclusion criteria:</b>                                                                                                                                                                                                                                                                                                                                                                                                                                                                                                                                                                                                                                                                                                                                                                                                                                                                                                                                                                                                                                                                                                                                                                                                                                                                                                                                                                                                                                                    | <b>Exclusion criteria:</b>                                                                                                                                                                                                                                                                                                                                                                                                                                                                                                                                                                                                                                                                                                                                                                                                                                                                                                                                                                                                                                                                                                                                                                                                                      |
|-------------------------------------------------------------------------------------------------------------------------------------------------------------------------------------------------------------------------------------------------------------------------------------------------------------------------------------------------------------------------------------------------------------------------------------------------------------------------------------------------------------------------------------------------------------------------------------------------------------------------------------------------------------------------------------------------------------------------------------------------------------------------------------------------------------------------------------------------------------------------------------------------------------------------------------------------------------------------------------------------------------------------------------------------------------------------------------------------------------------------------------------------------------------------------------------------------------------------------------------------------------------------------------------------------------------------------------------------------------------------------------------------------------------------------------------------------------------------------|-------------------------------------------------------------------------------------------------------------------------------------------------------------------------------------------------------------------------------------------------------------------------------------------------------------------------------------------------------------------------------------------------------------------------------------------------------------------------------------------------------------------------------------------------------------------------------------------------------------------------------------------------------------------------------------------------------------------------------------------------------------------------------------------------------------------------------------------------------------------------------------------------------------------------------------------------------------------------------------------------------------------------------------------------------------------------------------------------------------------------------------------------------------------------------------------------------------------------------------------------|
| <ol style="list-style-type: none"> <li>1) Age &gt; 18 years</li> <li>2) ECOG performance status of 0-2</li> <li>3) Pathologically proven diagnosis of NSCLC</li> <li>4) 1-5 sites of metastatic disease not including the primary tumor and regional nodes (<math>\leq 3</math> metastatic lesions in one organ will be eligible)</li> <li>5) Patients should have received at least 4-6 cycles of systemic therapy without progression on response Imaging</li> <li>6) Patients suitable for definitive therapy to the primary disease</li> <li>7) All the oligometastatic lesions should be radiologically visible and suitable for SBRT</li> <li>8) Adequate end organ function with CBC/differential obtained within 15 days before registration on the study, with adequate bone marrow function defined as follows:               <ul style="list-style-type: none"> <li>• Absolute neutrophil count (ANC) <math>\geq 500</math> cells/mm<sup>3</sup></li> <li>• Platelets <math>\geq 50,000</math> cells/mm<sup>3</sup></li> <li>• Hemoglobin <math>\geq 8.0</math> g/dl (Use of transfusion or other intervention to achieve Hgb <math>\geq 8.0</math> g/dl is acceptable);</li> </ul> </li> <li>9) Negative serum or urine pregnancy test for females of child-bearing potential, within 14 days before study registration</li> <li>10) Patients willing for written informed consent and must be willing to comply with the specified follow up schedule</li> </ol> | <ol style="list-style-type: none"> <li>1) Progressive disease after initial systemic therapy</li> <li>2) Positive oncogene mutations (EGFR/ALK/ROS)</li> <li>3) More than 5 sites of oligo metastases</li> <li>4) Metastatic lesion size &gt;5 cm</li> <li>5) More than three metastatic lesions in one organ</li> <li>6) Malignant peritoneal disease</li> <li>7) Malignant pleural effusion</li> <li>8) Leptomeningeal disease</li> <li>9) Brain metastases in the brain stem</li> <li>10) Clinical or radiological evidence of spinal cord compression or metastases within 2 mm of the spinal cord on MRI</li> <li>11) Severe, active co-morbidity defined as follows:               <ul style="list-style-type: none"> <li>• Unstable angina and/or congestive heart failure requiring hospitalization within the last 6 months</li> <li>• Transmural myocardial infarction within the last 6 months</li> <li>• Chronic Obstructive Pulmonary Disease exacerbation or other respiratory illness requiring hospitalization or precluding study therapy at the time of registration</li> </ul> </li> <li>12) Prior history of radiation therapy to the thorax</li> <li>13) Previous history of malignancy within the last 3 years</li> </ol> |

### Specific scenarios for Inclusion

- 1) Patients who underwent ablative RT or surgery or RFA for metastatic sites at presentation or during systemic therapy will be eligible provided the site is under control and the total number of oligometastatic sites at the time of study entry (treated site included) is  $\leq 5$ .
- 2) Palliative RT for symptomatic bony metastases will be eligible provided the treated site is under control and further ablative doses of radiation can be delivered.
- 3) Patients with vertebral metastases who underwent surgical decompression, or stabilization followed by palliative RT will be eligible in the study provided the treated site is under control and the patient has  $\leq 5$  sites (treated site included).

### Pre-randomization assessment

Eligible patients will undergo response assessment PET-CT or contrast-enhanced CT of thorax, abdomen, and pelvis after the completion of 4-6 cycles of standard systemic therapy. Complete history and thorough physical examination including PS assessment, baseline laboratory tests (including but not limited to complete blood count, renal function tests and liver function tests), 2D Echocardiography, and gadolinium contrast-enhanced MR Brain if not done earlier. Patients who do not have a progressive disease as per RECIST 1.1 will be eligible.

### Figure 1- Study schema

#### Defining the number of Oligometastases

All metastatic sites at presentation and on follow up imaging will be confirmed by an experienced radiologist and will be discussed in multidisciplinary joint clinics. The involvement of adjacent vertebrae by direct extension would be counted as one site and not two sites of metastases. Indeterminate parenchymal lung nodule or any suspicious lung lesion on baseline imaging will be again evaluated on the response imaging for its metastatic confirmation. If required, biopsy confirmation will be preferred but is not mandatory. Primary tumor and regional nodes' feasibility for definitive RT will be assessed by the study investigators before randomization. Non-regional nodes will be counted as an individual metastatic site. Patients who have received palliative RT for symptomatic bone and brain metastases during the initial period will be evaluated for local control of those sites. Additional ablative doses will be decided as per the study investigators' discretion.

### Control Arm – Standard Maintenance Therapy

All patients in this arm will receive standard maintenance therapy which includes chemotherapy, immunotherapy, or observation. SMT will be decided by the treating medical oncologist. Maintenance systemic therapy should start within 4-8 weeks of randomization. Palliative radiation therapy to existing metastatic sites in this arm will be done on clinical or radiological worsening. Acceptable RT doses include 8 Gy times one or two fractions or 20 Gy in five fractions. No ablative doses to metastatic sites are allowed in this arm.

### Experimental Arm – Local Consolidative Radiation Therapy + SMT

Patients in this arm will receive LCRT with SBRT to all oligometastatic sites and definitive RT to primary disease including involved regional nodes. SMT will be given as discussed in arm A. LCRT will be started within 4 weeks of randomization. Maintenance systemic therapy can be started concurrently or after completion of LCRT within 4 weeks. SBRT doses are given in Table 2. Definitive radiation for the primary and nodal disease would be done similarly as in locally advanced NSCLC with hypofractionation schedule to a dose of 45-55 Gy in 15-22 fractions. Doses will be decided depending upon normal tissue tolerances and at radiation oncologist's discretion.

**Table 2: LCRT doses for oligometastatic sites**

| Oligometastatic site                       | Location      | Dose per fraction (Gy) | Number of fractions | Total Dose  | Frequency       |
|--------------------------------------------|---------------|------------------------|---------------------|-------------|-----------------|
| <b>Primary (if N0) and Lung metastases</b> | Peripheral    | 12                     | 5                   | 60 Gy       | Alternate day   |
|                                            | Central       | 7.5                    | 8                   | 60 Gy       | Daily/Alternate |
|                                            | Ultra-central | 5                      | 10                  | 50 Gy       | Daily/Alternate |
| <b>Bone</b>                                | Spine         | 8 - 12                 | 3 - 2               | 24 Gy       | Alternate day   |
|                                            | Any other     | 7                      | 5                   | 35 Gy       | Daily/Alternate |
| <b>Brain</b>                               | Single        | 18-24                  | 1                   | 18-24       | Single          |
|                                            | 1-3 lesion    | 18-24 or 5             | 1 or 10             | 18-24 or 50 | Single/Daily    |
| <b>Adrenal</b>                             | NA            | 7 – 10 Gy              | 5                   | 35 – 50 Gy  | Daily/Alternate |
| <b>Liver</b>                               | Any           | 6 – 10 Gy              | 5                   | 30 – 50 Gy  | Daily/Alternate |

### Radiotherapy planning and delivery

1  
2  
3 All patients in the experimental arm will undergo CT-based planning which should completely  
4 cover all the areas of interest so that a composite dose distribution can be created for all  
5 metastatic sites. Ideally, patient position will be preferred to remain the same across all  
6 treatment sites except brain metastases. Four-dimensional CT (4D-CT) will be used to  
7 encompass tumor and organ motion for moving metastatic sites. Target volume delineation will  
8 be done as per the consensus guidelines for individual sites e.g. international spinal consortium  
9 guidelines for spinal metastases [23]. A high precision technique like SBRT will be used for  
10 oligometastatic sites. Treatment planning will be done using intensity-modulated radiation  
11 therapy (IMRT) or volumetric modulated Arc therapy (VMAT).  
12  
13  
14  
15  
16  
17  
18

### 19 **Radiomics**

20  
21 Texture analysis of medical images like CT and MRI assess heterogeneity of tumors and other  
22 benign lesions[24,25]. It evaluates the distribution of grey levels, coarseness, and regularity.  
23 As a radiomics endpoint, texture analysis will be done on pre and post-treatment imaging and  
24 their significance and correlation will be analyzed separately.  
25  
26  
27  
28

### 29 **Circulating Tumor Cells**

30  
31 In this study, the exploratory translational objective is to evaluate the significance of circulating  
32 tumor cells in the blood at baseline and subsequent follow-up. Circulating tumor cells have  
33 been identified as a prognostic marker in different tumor subtypes [26,27]. Serial follow up of  
34 CTCs in blood could predict clinical recurrence earlier than the radiological recurrence.  
35  
36  
37  
38

### 39 **Participant withdrawal/discontinuation:**

40  
41 The principal investigator can discontinue the treatment whenever deemed necessary if the  
42 patient has significant toxicities or in life-threatening clinical scenarios. Patients can withdraw  
43 from the study without giving any reasons, however, reasons for withdrawal would be preferred  
44 for study documentation. Any data prior to withdrawal will be used for the study related  
45 outcome analysis.  
46  
47  
48  
49

### 50 **Safety monitoring:**

51  
52 The data safety monitoring committee of the institute will monitor the progress of the study at  
53 regular intervals. Study modifications/amendments will be informed to IRB for approval, study  
54 sponsors, and will be uploaded in the clinical trials registry-India. All toxicities, treatment  
55  
56  
57  
58  
59  
60

1  
2  
3 interruptions or discontinuation and protocol deviations will be recorded and inform by the  
4 study investigators to the institutional review board as specified by the institutional guidelines.  
5  
6  
7  
8  
9

### 10 **Statistics:**

11  
12 **Randomization:** All eligible patients will be stratified according to the number of metastatic  
13 sites (1-2 vs 3-5), nodal status (N0-N1 vs N2-N3), and brain metastases (present vs absent).  
14 Patients will then undergo 1:1 randomization by an independent biostatistician with permuted  
15 block randomization.  
16  
17  
18

### 19 **Sample size calculation**

20  
21  
22 The results of the phase II study of Gomez et al demonstrated a median OS of 17 months in the  
23 SMT alone arm and 41.2 months in SMT + LCT arm. For this phase III study, we expected an  
24 absolute increase in median OS of 10 months ie. to 27 months with a hazard ratio (HR) of death  
25 of 0.63 in the SMT plus LCRT (experimental arm). To detect this difference, with 80% power  
26 and a two-sided alpha of 0.05, 148 events will be required, 80 in the control arm and 68 in the  
27 experimental arm. Assuming a 10% drop out rate, the total sample size would be 206 (103 in  
28 the control arm and 103 in the experimental arm). We intend to accrue 40-45 patients per year  
29 for a 5 year accrual period with a minimum follow up of two years. The total study duration is  
30 seven years.  
31  
32  
33  
34  
35  
36  
37

### 38 **Analysis**

39  
40 Study-related data will be collected in an electronic case record form (eCRF) and will be  
41 uploaded in a restricted-access database (REDCap). Data will be available to principal  
42 investigators and the statistical team of the study in a password protected computer folder.  
43 Patient baseline characteristics will be summarized by study arm and control arm. Chi-square  
44 test or Fisher's exact test will be applied to compare patient characteristics between the two  
45 arms. The primary endpoint of OS will be calculated as per the intention-to-treat analysis. OS  
46 and PFS will be calculated using the Kaplan-Meier method and log-rank test will be used for  
47 comparison between groups. Cox proportional hazard regression model will be used to analyze  
48 the effects of factors, in addition to treatment, that may be associated with OS and PFS. Chi-  
49 square test with Pearson's or Fisher's exact test will be used to compare the ORR between the  
50 two treatment arms. A similar test will be used to estimate the incidence of adverse events in  
51 each treatment arm (both acute and chronic toxicities). A p-value $\leq$ 0.05 in a two-tailed test will  
52  
53  
54  
55  
56  
57  
58  
59  
60

1  
2  
3 be considered statistically significant. Statistical analyses will be performed using SPSS  
4 version 25.0 (Statistical Package for Social Sciences) and STATA version 14.  
5  
6

### 7 **QOL Analysis**

8  
9 The EORTC QLQ-LC13 is a 13-item questionnaire grouped, while the QLQ-C30 comprises a  
10 30-item questionnaire. Raw scores will be standardized by linear transformation such that the  
11 final scores ranged between 0 and 100. Higher scores on the global QOL and functional scales  
12 represent a better QOL, whereas high symptom scale scores indicate significant symptoms or  
13 greater difficulty. Repeated-measures analysis of variance (RM-ANOVA) will be used to  
14 assess the interaction of time and group with time as within-subject factor and group as a  
15 between-subject factor with respect to EORTC QLQ 30 and LC30 from baseline to till the last  
16 follow-up.  
17  
18  
19  
20  
21  
22  
23

### 24 **Follow up evaluation and toxicity assessment**

25 All patients accrued in the control arm will be followed up every 3 monthly ( $\pm$  4 weeks) for the  
26 first 2 years and then 6 monthly ( $\pm$  6 weeks) afterward till 5 years and thereafter annually (Table  
27 3). Patients in the experimental arm during LCRT treatment will be reviewed once weekly for  
28 symptom and acute toxicity assessment if any. Post LCRT completion follows up will be done  
29 similarly as in the control arm. Adherence to protocol treatment and timely follow up of  
30 participants will be encouraged by the study investigators and team members through proper  
31 counselling, resolving queries and by allowing easy access to them. Any serious adverse events  
32 during treatment and at follow up will be documented, informed to IRB, managed  
33 appropriately, and will be followed up till resolution. At each visit, history and physical  
34 examination, ECOG PS, toxicity assessment using NCI CTC v5.0 will be recorded. Acute  
35 toxicity is defined as symptoms occurring within 90 days of the first fraction of radiotherapy.  
36 Late toxicity is defined as symptoms occurring beyond 90 days. Efficacy assessment will be  
37 done with CECT imaging of the disease sites at every follow-up. On equivocal suspicion of  
38 recurrent or PD, PET-CT or biopsy will be done. If biopsy not feasible, repeat imaging will be  
39 done after 4-8 weeks. MRI Brain will be done on clinical suspicion based on neurological  
40 worsening. EORTC QOL questionnaires will be completed by patients at 3, 6, and 12 months.  
41 If symptomatic before the scheduled follow up visit, relevant imaging will be done to rule out  
42 progression.  
43  
44  
45  
46  
47  
48  
49  
50  
51  
52  
53  
54  
55  
56  
57

### 58 **Table 3: Follow up visits schedule**



| Assessment           | Before randomization     | 1 <sup>st</sup> follow up at 3 months ( $\pm$ 4 weeks) | Every 3 month till 2 years ( $\pm$ 4 weeks) | Six monthly till 5 years ( $\pm$ 6 weeks) |
|----------------------|--------------------------|--------------------------------------------------------|---------------------------------------------|-------------------------------------------|
| Physical examination | x                        | x                                                      | x                                           | x                                         |
| Performance status   | x                        | x                                                      | x                                           | x                                         |
| RO assessment        | x                        | x                                                      | x                                           | x                                         |
| CECT (T+A+P)         | x                        | x                                                      | x                                           | x                                         |
| Toxicity evaluation  | x                        | x                                                      | x                                           | x                                         |
| MRI Brain            | x                        | As required                                            | As required                                 | As required                               |
| PET CT               | Not required (preferred) | Not required                                           | As required                                 | As required                               |
| QOL questionnaires   | x                        | x                                                      | x (At 6 and 12 months)                      | -                                         |

### Treatment at the progression:

Isolated progression at existing or new sites will be evaluated for local ablative therapies including surgery, SBRT, or radiofrequency ablation in both the arms. For limited or widespread metastases, subsequent lines of chemotherapy or immunotherapy will be decided at the investigator's discretion depending upon PS at the time of progression. Symptomatic sites will be offered palliative RT as per the existing institutional policies. Follow up schedule after progression will be adjusted to match the existing schedules within  $\pm$  6 weeks to avoid duplication of visits.

### Quality assurance:

Strict adherence to quality assurance protocols will be ensured for patients undergoing SBRT or definitive RT in the experimental arm. Full quality assurance guidelines will be published separately.

### Confidentiality:

Study participants' names and personal information will be held in strict confidence and will not be shared publicly. Participant details in case record forms, safety reports, and correspondence to IRB will be done with the study identification number and participant's



1  
2  
3 initials. Study investigators will maintain a master list with the participant's identification  
4 details.  
5

### 6 7 **Data sharing statement** 8

9  
10 Deidentified participant data from this study will not be shared publicly, however, the full  
11 protocol along with the primary analysis of the outcomes will be published in a peer reviewed  
12 indexed journal.  
13  
14

### 15 16 17 18 **Discussion:** 19

20  
21 Oligometastatic disease deserves attention owing to the increasing evidence from various  
22 retrospective and prospectively randomized studies. Two-phase II randomized studies in  
23 NSCLC patients have shown significant benefit in PFS (Table 4). Adequately powered well-  
24 conducted phase III RCT is needed to generate level I evidence to support the efficacy of local  
25 ablative therapies in OM NSCLC. There are two similar phase III RCT in progress for  
26 assessment of local ablative therapy in combination with systemic therapy (Table 5).  
27  
28  
29

30  
31  
32 The SARON trial (NCT02417662) is a multicenter, randomized phase III trial being conducted  
33 in 30 hospitals in the United Kingdom and plans to recruit 340 patients with oligometastatic  
34 EGFR, ALK, and ROS1 mutation-negative NSCLC (1-3 sites of synchronous metastatic  
35 disease at least one of which must be extracranial). Patients will receive either standard  
36 systemic therapy only or standard systemic therapy plus radical radiotherapy or SBRT to their  
37 primary tumors (and mediastinal nodes where present) and SBRT/SRS to all metastatic sites.  
38 The primary end-point of the study is overall survival.  
39  
40  
41  
42  
43  
44

45  
46 The OMEGA trial (NCT03827577) is a phase III randomized trial being conducted in Italy  
47 which proposes to recruit 195 patients with synchronous or metachronous oligometastatic  
48 NSCLC with up to 3 metastatic sites. The study will include both oncogene mutation-positive  
49 and negative patients and they will be randomized to receive either standard systemic therapy  
50 alone (platinum doublet chemotherapy or TKI or immunotherapy) or standard systemic therapy  
51 followed by SBRT, surgical resection or radiofrequency ablation (RFA). The primary endpoint  
52 of the study is overall survival.  
53  
54  
55  
56  
57

58 Our institute sees approximately 2500 new lung cancer patients annually. The proposed study  
59 is a single-center study and will recruit patients with  $\leq 5$  OM sites after completion of initial  
60

planned standard systemic therapy. This study will also include patients who have been treated with palliative RT at presentation and if controlled at the time of randomization. The possibility of further ablative doses at those particular sites will be ascertained by the radiation oncologist. The study is currently awaiting funding from extramural grants and will start recruitment once funding is arranged.

**Table 4: Prospective published studies of local consolidative therapy in OM NSCLC**

| Author, year                         | Study design                  | No. of patients      | No. of sites | Intervention              | Med FU (months) | Inclusion                         | Median Outcomes in months         |
|--------------------------------------|-------------------------------|----------------------|--------------|---------------------------|-----------------|-----------------------------------|-----------------------------------|
| Gomez et al (NSCLC)[19]              | RCT – II<br>CRT Arm<br>No CRT | 25<br>24             | ≤3           | LCT + MT Vs<br>MT/O alone | 38.8            | Synchronous#                      | PFS 14.4 Vs 4.4<br>OS 41.2 Vs 17  |
| Iyengar et al (NSCLC)[28]            | RCT - II                      | 14<br>15             | ≤5           | SABR + MT<br>Vs MT alone  | 9.6             | Synchronous                       | PFS 9.7 vs 3.5                    |
| Palma et al (various primaries)[29]  | RCT - II                      | 66<br>33             | ≤5           | SABR +SOC<br>vs SOC alone | 26              | Synchronous<br>or<br>metachronous | OS 41 Vs 28,                      |
| Sutera et al (various primaries)[30] | Phase II                      | 147<br>(lung-<br>32) | ≤5           | SABR                      | 41.3            | Synchronous<br>or<br>metachronous | OS 42.3<br>(Lung OS –<br>26.8)    |
| Ruysscher et al (NSCLC)[31]          | Phase II                      | 40                   | ≤5           | SABR                      | 27.7            | Synchronous                       | OS – 13.5                         |
| Petty et al (NSCLC) [32]             | Phase II                      | 29                   | ≤ 5          | SBRT                      | 24.2            | Synchronous                       | OS – 28.4<br>PFS – 11.2           |
| Collen et al (NSCLC) [33]            | Phase II                      | 26                   | ≤ 5          | SBRT                      | 16.4            |                                   | OS – 23<br>PFS – 11.2             |
| Arrieta et al (NSCLC) [34]           | Phase II                      | 37                   | ≤5           | RCT                       | 32.5            | Synchronous#                      | OS – not<br>reached<br>PFS – 23.5 |

# includes oncogene mutation-positive patients

Abbreviations: RCT – randomized controlled trial, OM – oligometastases, NSCLC – non-small cell lung cancer, TNBC – triple-negative breast cancer, SMT – standard maintenance therapy, SBRT – stereotactic body radiation therapy, LAT – local ablative therapy, SOC – standard of care, LCRT – local consolidation radiation therapy, OS – Overall survival, PFS – progression-free survival

**Table 5: Ongoing Randomized Studies in Oligometastatic NSCLC**

|                              | <b>SARON</b>                             | <b>OMEGA</b>                     | <b>CORE</b>             | <b>PROMISE-005</b>          | <b>NRG LU 002</b>                          | <b>Current Study</b> |
|------------------------------|------------------------------------------|----------------------------------|-------------------------|-----------------------------|--------------------------------------------|----------------------|
| Trial ID                     | NCT02417662                              | NCT03827577                      | NCT02759783             | NCT03808337                 | NCT03137771                                | CTRI/2020/04/024761  |
| Country                      | UK                                       | Italy                            | UK                      | USA                         | Multicentric                               | India                |
| Trial Design                 | RCT III                                  | RCT III                          | RCT II/III              | RCT II                      | RCTII/III                                  | RCT III              |
| No. of OM sites              | ≤3                                       | ≤3                               | ≤3                      | ≤5                          | ≤3                                         | ≤5                   |
| Presentation                 | Synchronous at least 1 extracranial site | Synchronous or metachronous      | Metachronous            | Synchronous or metachronous | Synchronous or metachronous (extracranial) | Synchronous          |
| Primary Site                 | NSCLC                                    | NSCLC                            | Breast, Prostate, NSCLC | TNBC, NSCLC                 | NSCLC                                      | NSCLC                |
| Oncogene mutation            | Negative*                                | Negative and Positive            | --                      | Negative and Positive       | Negative                                   | Negative             |
| Target accrual               | 340                                      | 195                              | 245                     | 142                         | 300                                        | 206                  |
| Control Arm                  | SMT                                      | Systemic therapy                 | SOC                     | SOC                         | SMT                                        | SMT                  |
| Experimental Arm             | RT to primary and SBRT for OM            | Systemic therapy followed by LAT | SBRT followed by SOC    | SBRT plus SOC               | LCT + SMT                                  | LCRT + SMT           |
| Primary end point            | OS                                       | OS                               | PFS/OS                  | PFS                         | PFS/OS                                     | OS                   |
| Estimated year of completion | 2022                                     | 2022                             | 2024                    | 2022                        | 2022                                       | 2024                 |

\*Negative indicates for de-novo stage IV non-small cell lung cancer

Abbreviations: RCT – randomized controlled trial, OM – oligometastases, NSCLC – non-small cell lung cancer, TNBC – triple-negative breast cancer, SMT – standard maintenance therapy, SBRT – stereotactic body radiation therapy, LAT – local ablative therapy, SOC – standard of care, LCRT – local consolidation radiation therapy, OS – Overall survival, PFS – progression-free survival

**Author contributions:** Concept and design of the study – AT and JPA. The initial draft of Protocol – AT, JPA. The final draft of the protocol - AT, JPA, SS, NM, KP, VN, VP, NP, AJ, and SK. All authors read and approved the final protocol

**Funding:** The study is awaiting funds from extramural grants. Funding bodies will not have any role in study design modifications, data collection, and analysis of the study.

**Competing interests:** Dr. VN has received institutional research funding from Amgen, Sanofi India Ltd, Dr. Reddy's Laboratories Inc., Intas Pharmaceuticals, and Astra Zeneca Pharma India Ltd. All research grants have been paid to the institution. Dr. Kumar Prabhash has received research funding from Dr. Reddy's Laboratories Inc., Fresenius Kabi India Pvt. Ltd., Alkem Laboratories, Natco Pharma Ltd., BDR Pharmaceuticals Intl. Pvt. Ltd, and Roche Holding AG (all research grants paid to the institution and are unrelated to this study project). The rest of the authors declare that they have no competing interest in the proposed study protocol.

**Ethics approval and consent to participate:** The study is approved by the institutional ethics committee of Tata Memorial Hospital (TMH IRB project number – 3445). Written informed consent will be obtained from all the patients for study interventions, biomarkers and radiomics part of the study. The study is registered prospectively with Clinical Trials Registry – India, CTRI/2020/04/024761, dated April 21<sup>st</sup>, 2020.

**Consent for publication:** Not applicable

**Availability of data and materials:** Additional information on the protocol is available by contacting the corresponding author. There is no data reported in this manuscript.

**Acknowledgments:** None

## Figure legends

Figure 1: Study schema

## References:

- 1 Solomon BJ, Mok T, Kim D-W, *et al.* First-Line Crizotinib versus Chemotherapy in ALK -Positive Lung Cancer . *N Engl J Med* 2014;**371**:2167–77.  
doi:10.1056/nejmoa1408440
- 2 Soria J-C, Ohe Y, Vansteenkiste J, *et al.* Osimertinib in Untreated EGFR -Mutated Advanced Non–Small-Cell Lung Cancer . *N Engl J Med* 2017;**378**:113–25.  
doi:10.1056/nejmoa1713137

- 3 Rosell R, Carcereny E, Gervais R, *et al.* Erlotinib versus standard chemotherapy as first-line treatment for European patients with advanced EGFR mutation-positive non-small-cell lung cancer (EURTAC): A multicentre, open-label, randomised phase 3 trial. *Lancet Oncol* 2012;**13**:239–46. doi:10.1016/S1470-2045(11)70393-X
- 4 Patil VM, Noronha V, Joshi A, *et al.* Phase III study of gefitinib or pemetrexed with carboplatin in EGFR-mutated advanced lung adenocarcinoma. *ESMO Open* 2017;**2**:10–8. doi:10.1136/esmoopen-2017-000168
- 5 Reck M, Rodriguez-Abreu D, Robinson AG, *et al.* Pembrolizumab versus Chemotherapy for PD-L1-Positive Non-Small-Cell Lung Cancer. *N Engl J Med* 2016;**375**:1823–33. doi:10.1056/NEJMoa1606774
- 6 Mok TSK, Wu YL, Kudaba I, *et al.* Pembrolizumab versus chemotherapy for previously untreated, PD-L1-expressing, locally advanced or metastatic non-small-cell lung cancer (KEYNOTE-042): a randomised, open-label, controlled, phase 3 trial. *Lancet* 2019;**393**:1819–30. doi:10.1016/S0140-6736(18)32409-7
- 7 Ashworth AB, Senan S, Palma DA, *et al.* An individual patient data metaanalysis of outcomes and prognostic factors after treatment of oligometastatic non-small-cell lung cancer. *Clin Lung Cancer* 2014;**15**:346–55. doi:10.1016/j.clcc.2014.04.003
- 8 Van den Begin R, Engels B, Collen C, *et al.* The METABANK score: A clinical tool to predict survival after stereotactic radiotherapy for oligometastatic disease. *Radiother Oncol* 2019;**133**:113–9. doi:10.1016/j.radonc.2019.01.001
- 9 Hellman S, Weichselbaum RR. Oligometastases. *J. Clin. Oncol.* 1995;**13**:8–10. doi:10.1200/jco.1995.13.1.8
- 10 Weichselbaum RR, Hellman S. Oligometastases revisited. *Nat. Rev. Clin. Oncol.* 2011;**8**:378–82. doi:10.1038/nrclinonc.2011.44
- 11 Gomez DR, Tang C, Zhang J, *et al.* Local consolidative therapy vs. Maintenance therapy or observation for patients with oligometastatic non-small-cell lung cancer: Long-term results of a multi-institutional, phase II, randomized study. *J Clin Oncol* 2019;**37**:1558–65. doi:10.1200/JCO.19.00201
- 12 Dingemans AMC, Hendriks LEL, Berghmans T, *et al.* Definition of Synchronous Oligometastatic Non-Small Cell Lung Cancer—A Consensus Report. *J Thorac Oncol*

- 2019;**14**:2109–19. doi:10.1016/j.jtho.2019.07.025
- 13 Lievens Y, Guckenberger M, Gomez D, *et al.* Defining oligometastatic disease from a radiation oncology perspective: An ESTRO-ASTRO consensus document. *Radiother Oncol* 2020;**148**:157–66. doi:10.1016/j.radonc.2020.04.003
- 14 Rusthoven KE, Hammerman SF, Kavanagh BD, *et al.* Is there a role for consolidative stereotactic body radiation therapy following first-line systemic therapy for metastatic lung cancer? A patterns-of-failure analysis. *Acta Oncol (Madr)* 2009;**48**:578–83. doi:10.1080/02841860802662722
- 15 Patel SH, Rimner A, Foster A, *et al.* Patterns of initial and intracranial failure in metastatic EGFR-mutant non-small cell lung cancer treated with erlotinib. *Lung Cancer* 2017;**108**:109–14. doi:10.1016/j.lungcan.2017.03.010
- 16 Al-Halabi H, Sayegh K, Digamurthy SR, *et al.* Pattern of failure analysis in metastatic EGFR-mutant lung cancer treated with tyrosine kinase inhibitors to identify candidates for consolidation stereotactic body radiation therapy. *J Thorac Oncol* 2015;**10**:1601–7. doi:10.1097/JTO.0000000000000648
- 17 Parikh RB, Cronin AM, Kozono DE, *et al.* Definitive primary therapy in patients presenting with oligometastatic non-small cell lung cancer. *Int J Radiat Oncol Biol Phys* 2014;**89**:880–7. doi:10.1016/j.ijrobp.2014.04.007
- 18 Xu Q, Wang Y, Liu H, *et al.* Treatment outcome for patients with primary NSCLC and synchronous solitary metastasis. *Clin Transl Oncol* 2013;**15**:802–9. doi:10.1007/s12094-013-1008-2
- 19 Gomez DR, Blumenschein GR, Lee JJ, *et al.* Local consolidative therapy versus maintenance therapy or observation for patients with oligometastatic non-small-cell lung cancer without progression after first-line systemic therapy: a multicentre, randomised, controlled, phase 2 study. *Lancet Oncol* 2016;**17**:1672–82. doi:10.1016/S1470-2045(16)30532-0
- 20 Nsclc LC, Elamin YY, Gomez DR, *et al.* Local Consolidation Therapy ( LCT ) After First Line Tyrosine Kinase Inhibitor ( TKI ) for Patients With EGFR Mutant Metastatic Non e small-cell. *Clin Lung Cancer* 2019;**20**:43–7. doi:10.1016/j.clc.2018.09.015

- 1  
2  
3  
4  
5  
6  
7  
8  
9  
10  
11  
12  
13  
14  
15  
16  
17  
18  
19  
20  
21  
22  
23  
24  
25  
26  
27  
28  
29  
30  
31  
32  
33  
34  
35  
36  
37  
38  
39  
40  
41  
42  
43  
44  
45  
46  
47  
48  
49  
50  
51  
52  
53  
54  
55  
56  
57  
58  
59  
60
- 21 Wang X, Zeng M. First-line tyrosine kinase inhibitor with or without aggressive upfront local radiation therapy in patients with EGFRm oligometastatic non-small cell lung cancer: Interim results of a randomized phase III, open-label clinical trial (SINDAS) (NCT02893332). *J Clin Oncol* 2020;**38**:9508–9508. doi:10.1200/jco.2020.38.15\_suppl.9508
- 22 Mak RH, Doran E, Muzikansky A, *et al.* Outcomes After Combined Modality Therapy for EGFR -Mutant and Wild-Type Locally Advanced NSCLC. *Oncologist* 2011;**16**:886–95. doi:10.1634/theoncologist.2011-0040
- 23 Cox BW, Spratt DE, Lovelock M, *et al.* International spine radiosurgery consortium consensus guidelines for target volume definition in spinal stereotactic radiosurgery. *Int J Radiat Oncol Biol Phys* 2012;**83**:e597–605. doi:10.1016/j.ijrobp.2012.03.009
- 24 Dou TH, Coroller TP, van Griethuysen JJM, *et al.* Peritumoral radiomics features predict distant metastasis in locally advanced NSCLC. *PLoS One* 2018;**13**:1–15. doi:10.1371/journal.pone.0206108
- 25 Aerts HJWL, Velazquez ER, Leijenaar RTH, *et al.* Decoding tumour phenotype by noninvasive imaging using a quantitative radiomics approach. *Nat Commun* 2014;**5**. doi:10.1038/ncomms5006
- 26 Alix-Panabières C, Pantel K. Clinical applications of circulating tumor cells and circulating tumor DNA as liquid biopsy. *Cancer Discov.* 2016;**6**:479–91. doi:10.1158/2159-8290.CD-15-1483
- 27 Lindsay CR, Faugeroux V, Michiels S, *et al.* A prospective examination of circulating tumor cell profiles in non-small-cell lung cancer molecular subgroups. *Ann Oncol Off J Eur Soc Med Oncol* 2017;**28**:1523–31. doi:10.1093/annonc/mdx156
- 28 Iyengar P, Wardak Z, Gerber DE, *et al.* Consolidative radiotherapy for limited metastatic non-small-cell lung cancer: A phase 2 randomized clinical trial. *JAMA Oncol* 2018;**4**:1–4. doi:10.1001/jamaoncol.2017.3501
- 29 Palma DA, Olson R, Harrow S, *et al.* Stereotactic ablative radiotherapy versus standard of care palliative treatment in patients with oligometastatic cancers (SABR-COMET): a randomised, phase 2, open-label trial. *Lancet* 2019;**393**:2051–8. doi:10.1016/S0140-6736(18)32487-5



- 1  
2  
3 30 Sutera P, Clump DA, Kalash R, *et al.* Initial Results of a Multicenter Phase 2 Trial of  
4 Stereotactic Ablative Radiation Therapy for Oligometastatic Cancer. *Radiat Oncol*  
5 *Biol* 2019;**103**:116–22. doi:10.1016/j.ijrobp.2018.08.027  
6  
7  
8  
9 31 De Ruyscher D, Wanders R, Hendriks LE, *et al.* Progression-Free Survival and  
10 Overall Survival Beyond 5 Years of NSCLC Patients With Synchronous  
11 Oligometastases Treated in a Prospective Phase II Trial (NCT 01282450). *J Thorac*  
12 *Oncol* 2018;**13**:1958–61. doi:10.1016/j.jtho.2018.07.098  
13  
14  
15  
16 32 Petty WJ, Urbanic JJ, Ahmed T, *et al.* Long-Term Outcomes of a Phase 2 Trial of  
17 Chemotherapy With Consolidative Radiation Therapy for Oligometastatic Non-Small  
18 Cell Lung Cancer. *Int J Radiat Oncol Biol Phys* 2018;**102**:527–35.  
19 doi:10.1016/j.ijrobp.2018.06.400  
20  
21  
22  
23  
24 33 Collen C, Christian N, Schallier D, *et al.* Phase II study of stereotactic body  
25 radiotherapy to primary tumor and metastatic locations in oligometastatic nonsmall-  
26 cell lung cancer patients. *Ann Oncol* 2014;**25**:1954–9. doi:10.1093/annonc/mdu370  
27  
28  
29  
30 34 Arrieta O, Barrón F, Maldonado F, *et al.* Radical consolidative treatment provides a  
31 clinical benefit and long-term survival in patients with synchronous oligometastatic  
32 non-small cell lung cancer: A phase II study. *Lung Cancer* 2019;**130**:67–75.  
33 doi:10.1016/j.lungcan.2019.02.006  
34  
35  
36  
37  
38  
39  
40  
41  
42  
43  
44  
45  
46  
47  
48  
49  
50  
51  
52  
53  
54  
55  
56  
57  
58  
59  
60



1  
2  
3  
4  
5  
6  
7  
8  
9  
10  
11  
12  
13  
14  
15  
16  
17  
18  
19  
20  
21  
22  
23  
24  
25  
26  
27  
28  
29  
30  
31  
32  
33  
34  
35  
36  
37  
38  
39  
40  
41  
42  
43  
44  
45  
46  
47  
48  
49  
50  
51  
52  
53  
54  
55  
56  
57  
58  
59  
60

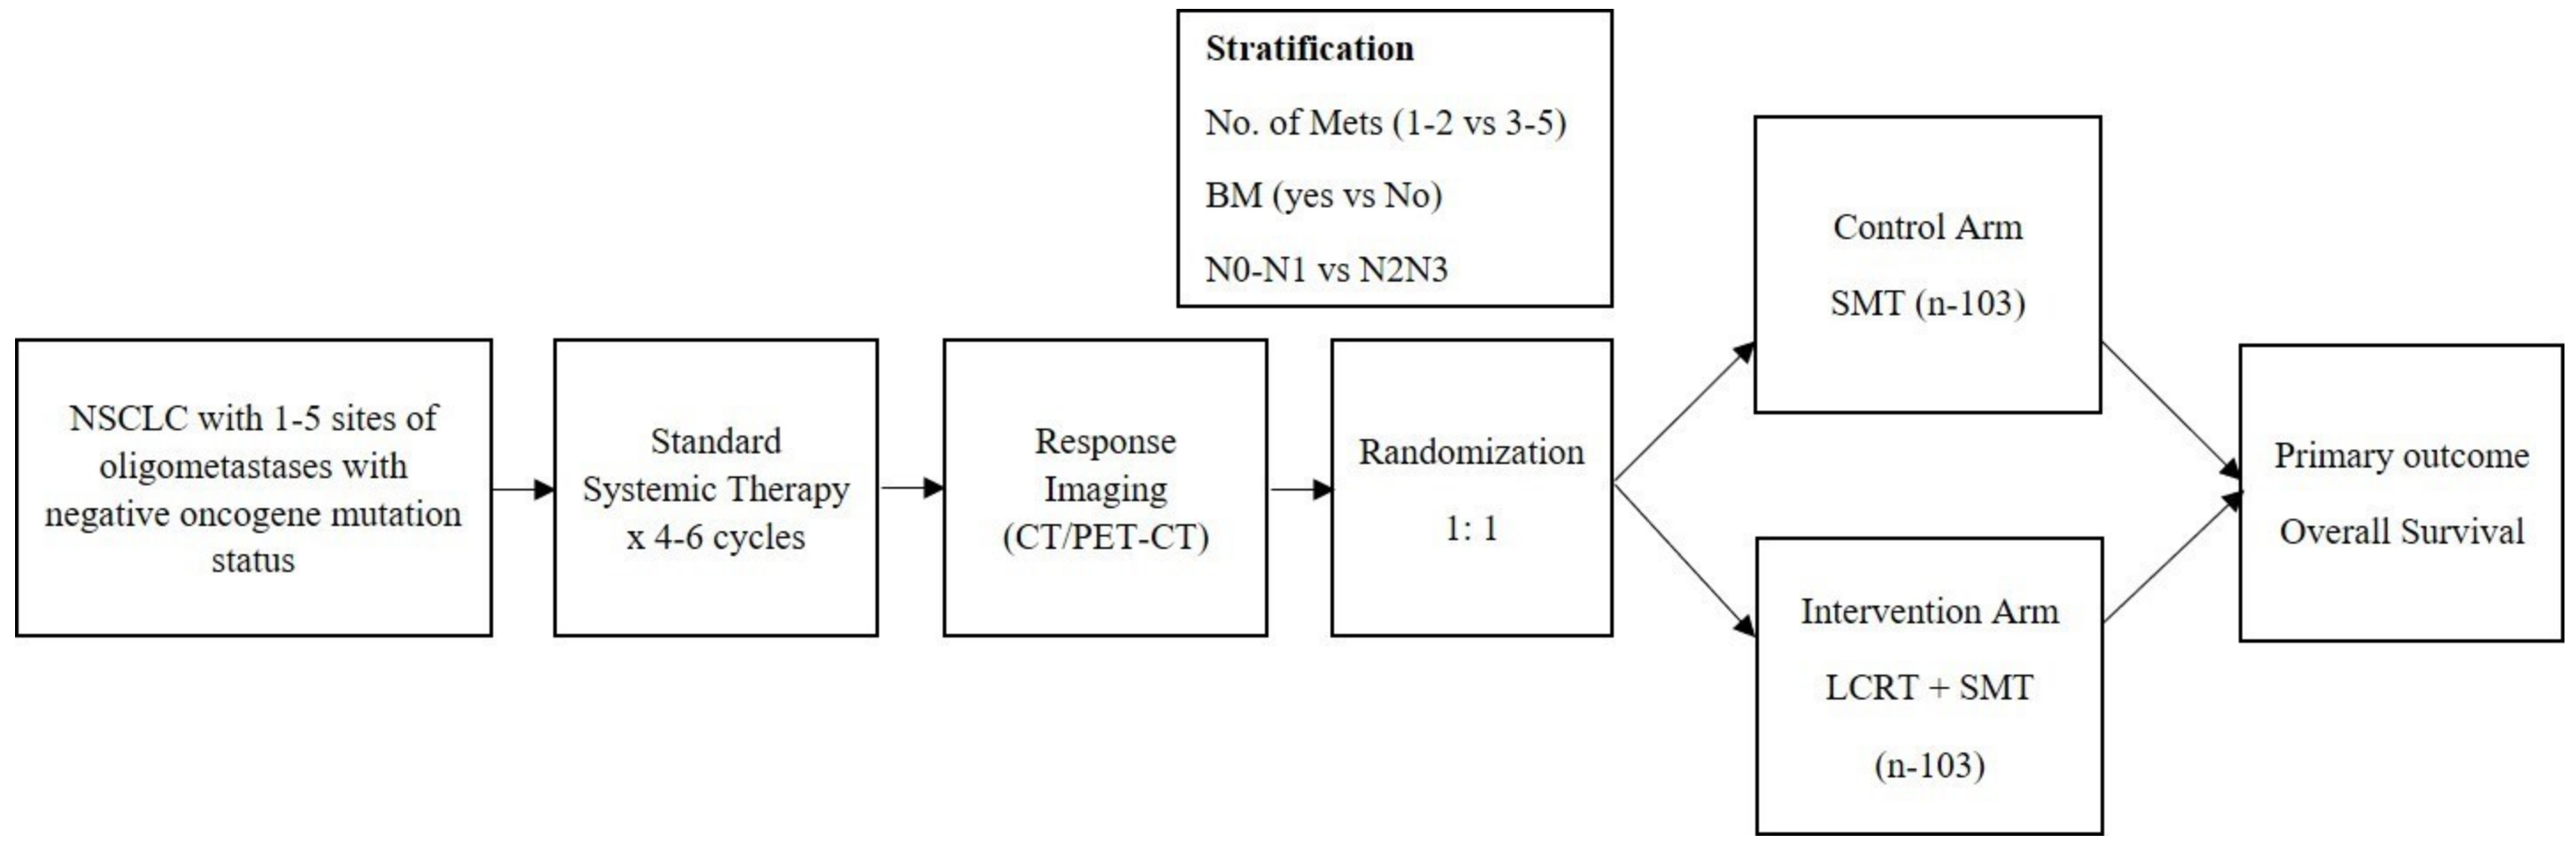

# Reporting checklist for protocol of a clinical trial.

Based on the SPIRIT guidelines.

## Instructions to authors

Complete this checklist by entering the page numbers from your manuscript where readers will find each of the items listed below.

Your article may not currently address all the items on the checklist. Please modify your text to include the missing information. If you are certain that an item does not apply, please write "n/a" and provide a short explanation.

Upload your completed checklist as an extra file when you submit to a journal.

In your methods section, say that you used the SPIRIT reporting guidelines, and cite them as:

Chan A-W, Tetzlaff JM, Altman DG, Laupacis A, Gøtzsche PC, Krleža-Jerić K, Hróbjartsson A, Mann H, Dickersin K, Berlin J, Doré C, Parulekar W, Summerskill W, Groves T, Schulz K, Sox H, Rockhold FW, Rennie D, Moher D. SPIRIT 2013 Statement: Defining standard protocol items for clinical trials. *Ann Intern Med.* 2013;158(3):200-207

|                                   |                    | Reporting Item                                                                                               | Page Number |
|-----------------------------------|--------------------|--------------------------------------------------------------------------------------------------------------|-------------|
| <b>Administrative information</b> |                    |                                                                                                              |             |
| Title                             | <a href="#">#1</a> | Descriptive title identifying the study design, population, interventions, and, if applicable, trial acronym | 1           |

|    |                     |                     |                                                            |    |
|----|---------------------|---------------------|------------------------------------------------------------|----|
| 1  | Trial registration  | <a href="#">#2a</a> | Trial identifier and registry name. If not yet registered, | 2  |
| 2  |                     |                     | name of intended registry                                  |    |
| 3  |                     |                     |                                                            |    |
| 4  |                     |                     |                                                            |    |
| 5  |                     |                     |                                                            |    |
| 6  | Trial registration: | <a href="#">#2b</a> | All items from the World Health Organization Trial         | 2  |
| 7  | data set            |                     | Registration Data Set                                      |    |
| 8  |                     |                     |                                                            |    |
| 9  |                     |                     |                                                            |    |
| 10 |                     |                     |                                                            |    |
| 11 | Protocol version    | <a href="#">#3</a>  | Date and version identifier                                | 2  |
| 12 |                     |                     |                                                            |    |
| 13 |                     |                     |                                                            |    |
| 14 |                     |                     |                                                            |    |
| 15 | Funding             | <a href="#">#4</a>  | Sources and types of financial, material, and other        | 17 |
| 16 |                     |                     | support                                                    |    |
| 17 |                     |                     |                                                            |    |
| 18 |                     |                     |                                                            |    |
| 19 |                     |                     |                                                            |    |
| 20 | Roles and           | <a href="#">#5a</a> | Names, affiliations, and roles of protocol contributors    | 17 |
| 21 | responsibilities:   |                     |                                                            |    |
| 22 |                     |                     |                                                            |    |
| 23 | contributorship     |                     |                                                            |    |
| 24 |                     |                     |                                                            |    |
| 25 |                     |                     |                                                            |    |
| 26 |                     |                     |                                                            |    |
| 27 |                     |                     |                                                            |    |
| 28 | Roles and           | <a href="#">#5b</a> | Name and contact information for the trial sponsor         | 17 |
| 29 | responsibilities:   |                     |                                                            |    |
| 30 |                     |                     |                                                            |    |
| 31 | sponsor contact     |                     |                                                            |    |
| 32 |                     |                     |                                                            |    |
| 33 | information         |                     |                                                            |    |
| 34 |                     |                     |                                                            |    |
| 35 |                     |                     |                                                            |    |
| 36 |                     |                     |                                                            |    |
| 37 |                     |                     |                                                            |    |
| 38 | Roles and           | <a href="#">#5c</a> | Role of study sponsor and funders, if any, in study        | 17 |
| 39 | responsibilities:   |                     | design; collection, management, analysis, and              |    |
| 40 |                     |                     | interpretation of data; writing of the report; and the     |    |
| 41 | sponsor and funder  |                     | decision to submit the report for publication, including   |    |
| 42 |                     |                     | whether they will have ultimate authority over any of      |    |
| 43 |                     |                     | these activities                                           |    |
| 44 |                     |                     |                                                            |    |
| 45 |                     |                     |                                                            |    |
| 46 |                     |                     |                                                            |    |
| 47 |                     |                     |                                                            |    |
| 48 |                     |                     |                                                            |    |
| 49 |                     |                     |                                                            |    |
| 50 |                     |                     |                                                            |    |
| 51 |                     |                     |                                                            |    |
| 52 | Roles and           | <a href="#">#5d</a> | Composition, roles, and responsibilities of the            | 17 |
| 53 | responsibilities:   |                     | coordinating centre, steering committee, endpoint          |    |
| 54 |                     |                     | adjudication committee, data management team, and          |    |
| 55 | committees          |                     |                                                            |    |
| 56 |                     |                     |                                                            |    |
| 57 |                     |                     |                                                            |    |
| 58 |                     |                     |                                                            |    |
| 59 |                     |                     |                                                            |    |
| 60 |                     |                     |                                                            |    |

1 other individuals or groups overseeing the trial, if  
 2 applicable (see Item 21a for data monitoring  
 3 committee)  
 4  
 5  
 6  
 7

## 8 Introduction

|                              |                     |                                                          |     |
|------------------------------|---------------------|----------------------------------------------------------|-----|
| 11 Background and            | <a href="#">#6a</a> | Description of research question and justification for   | 4-5 |
| 12 rationale                 |                     | undertaking the trial, including summary of relevant     |     |
| 13                           |                     | studies (published and unpublished) examining            |     |
| 14                           |                     | benefits and harms for each intervention                 |     |
| 15                           |                     |                                                          |     |
| 16                           |                     |                                                          |     |
| 17                           |                     |                                                          |     |
| 18                           |                     |                                                          |     |
| 19                           |                     |                                                          |     |
| 20                           |                     |                                                          |     |
| 21 Background and            | <a href="#">#6b</a> | Explanation for choice of comparators                    | 4-5 |
| 22 rationale: choice of      |                     |                                                          |     |
| 23 comparators               |                     |                                                          |     |
| 24                           |                     |                                                          |     |
| 25                           |                     |                                                          |     |
| 26                           |                     |                                                          |     |
| 27                           |                     |                                                          |     |
| 28                           |                     |                                                          |     |
| 29 Objectives                | <a href="#">#7</a>  | Specific objectives or hypotheses                        | 6   |
| 30                           |                     |                                                          |     |
| 31                           |                     |                                                          |     |
| 32 Trial design              | <a href="#">#8</a>  | Description of trial design including type of trial (eg, | 5   |
| 33                           |                     | parallel group, crossover, factorial, single group),     |     |
| 34                           |                     | allocation ratio, and framework (eg, superiority,        |     |
| 35                           |                     | equivalence, non-inferiority, exploratory)               |     |
| 36                           |                     |                                                          |     |
| 37                           |                     |                                                          |     |
| 38                           |                     |                                                          |     |
| 39                           |                     |                                                          |     |
| 40                           |                     |                                                          |     |
| 41                           |                     |                                                          |     |
| 42 <b>Methods:</b>           |                     |                                                          |     |
| 43                           |                     |                                                          |     |
| 44 <b>Participants,</b>      |                     |                                                          |     |
| 45                           |                     |                                                          |     |
| 46 <b>interventions, and</b> |                     |                                                          |     |
| 47                           |                     |                                                          |     |
| 48 <b>outcomes</b>           |                     |                                                          |     |
| 49                           |                     |                                                          |     |
| 50                           |                     |                                                          |     |
| 51 Study setting             | <a href="#">#9</a>  | Description of study settings (eg, community clinic,     | 5   |
| 52                           |                     | academic hospital) and list of countries where data will |     |
| 53                           |                     |                                                          |     |
| 54                           |                     |                                                          |     |
| 55                           |                     |                                                          |     |
| 56                           |                     |                                                          |     |
| 57                           |                     |                                                          |     |
| 58                           |                     |                                                          |     |
| 59                           |                     |                                                          |     |
| 60                           |                     |                                                          |     |

|    |                      |                                                                             |     |
|----|----------------------|-----------------------------------------------------------------------------|-----|
| 1  |                      | be collected. Reference to where list of study sites can                    |     |
| 2  |                      |                                                                             |     |
| 3  |                      | be obtained                                                                 |     |
| 4  |                      |                                                                             |     |
| 5  |                      |                                                                             |     |
| 6  | Eligibility criteria | <a href="#">#10</a> Inclusion and exclusion criteria for participants. If   | 7-8 |
| 7  |                      |                                                                             |     |
| 8  |                      | applicable, eligibility criteria for study centres and                      |     |
| 9  |                      |                                                                             |     |
| 10 |                      | individuals who will perform the interventions (eg,                         |     |
| 11 |                      |                                                                             |     |
| 12 |                      | surgeons, psychotherapists)                                                 |     |
| 13 |                      |                                                                             |     |
| 14 |                      |                                                                             |     |
| 15 |                      |                                                                             |     |
| 16 | Interventions:       | <a href="#">#11a</a> Interventions for each group with sufficient detail to | 9   |
| 17 |                      |                                                                             |     |
| 18 | description          | allow replication, including how and when they will be                      |     |
| 19 |                      |                                                                             |     |
| 20 |                      | administered                                                                |     |
| 21 |                      |                                                                             |     |
| 22 |                      |                                                                             |     |
| 23 | Interventions:       | <a href="#">#11b</a> Criteria for discontinuing or modifying allocated      | 10  |
| 24 |                      |                                                                             |     |
| 25 | modifications        | interventions for a given trial participant (eg, drug dose                  |     |
| 26 |                      |                                                                             |     |
| 27 |                      | change in response to harms, participant request, or                        |     |
| 28 |                      |                                                                             |     |
| 29 |                      | improving / worsening disease)                                              |     |
| 30 |                      |                                                                             |     |
| 31 |                      |                                                                             |     |
| 32 |                      |                                                                             |     |
| 33 | Interventions:       | <a href="#">#11c</a> Strategies to improve adherence to intervention        | 12  |
| 34 |                      |                                                                             |     |
| 35 | adherence            | protocols, and any procedures for monitoring                                |     |
| 36 |                      |                                                                             |     |
| 37 |                      | adherence (eg, drug tablet return; laboratory tests)                        |     |
| 38 |                      |                                                                             |     |
| 39 |                      |                                                                             |     |
| 40 |                      |                                                                             |     |
| 41 | Interventions:       | <a href="#">#11d</a> Relevant concomitant care and interventions that are   | 9   |
| 42 |                      |                                                                             |     |
| 43 | concomitant care     | permitted or prohibited during the trial                                    |     |
| 44 |                      |                                                                             |     |
| 45 |                      |                                                                             |     |
| 46 | Outcomes             | <a href="#">#12</a> Primary, secondary, and other outcomes, including the   | 6   |
| 47 |                      |                                                                             |     |
| 48 |                      | specific measurement variable (eg, systolic blood                           |     |
| 49 |                      |                                                                             |     |
| 50 |                      | pressure), analysis metric (eg, change from baseline,                       |     |
| 51 |                      |                                                                             |     |
| 52 |                      | final value, time to event), method of aggregation (eg,                     |     |
| 53 |                      |                                                                             |     |
| 54 |                      | median, proportion), and time point for each outcome.                       |     |
| 55 |                      |                                                                             |     |
| 56 |                      |                                                                             |     |
| 57 |                      |                                                                             |     |
| 58 |                      |                                                                             |     |
| 59 |                      |                                                                             |     |
| 60 |                      |                                                                             |     |

|    |                           |                                                                          |      |
|----|---------------------------|--------------------------------------------------------------------------|------|
| 1  |                           | Explanation of the clinical relevance of chosen efficacy                 |      |
| 2  |                           | and harm outcomes is strongly recommended                                |      |
| 3  |                           |                                                                          |      |
| 4  |                           |                                                                          |      |
| 5  |                           |                                                                          |      |
| 6  | Participant timeline      | <a href="#">#13</a> Time schedule of enrolment, interventions (including | 9,12 |
| 7  |                           | any run-ins and washouts), assessments, and visits for                   |      |
| 8  |                           | participants. A schematic diagram is highly                              |      |
| 9  |                           | recommended (see Figure)                                                 |      |
| 10 |                           |                                                                          |      |
| 11 |                           |                                                                          |      |
| 12 |                           |                                                                          |      |
| 13 |                           |                                                                          |      |
| 14 |                           |                                                                          |      |
| 15 | Sample size               | <a href="#">#14</a> Estimated number of participants needed to achieve   | 11   |
| 16 |                           | study objectives and how it was determined, including                    |      |
| 17 |                           | clinical and statistical assumptions supporting any                      |      |
| 18 |                           | sample size calculations                                                 |      |
| 19 |                           |                                                                          |      |
| 20 |                           |                                                                          |      |
| 21 |                           |                                                                          |      |
| 22 |                           |                                                                          |      |
| 23 |                           |                                                                          |      |
| 24 |                           |                                                                          |      |
| 25 | Recruitment               | <a href="#">#15</a> Strategies for achieving adequate participant        | 11   |
| 26 |                           | enrolment to reach target sample size                                    |      |
| 27 |                           |                                                                          |      |
| 28 |                           |                                                                          |      |
| 29 |                           |                                                                          |      |
| 30 |                           |                                                                          |      |
| 31 | <b>Methods:</b>           |                                                                          |      |
| 32 |                           |                                                                          |      |
| 33 | <b>Assignment of</b>      |                                                                          |      |
| 34 | <b>interventions (for</b> |                                                                          |      |
| 35 | <b>controlled trials)</b> |                                                                          |      |
| 36 |                           |                                                                          |      |
| 37 |                           |                                                                          |      |
| 38 |                           |                                                                          |      |
| 39 |                           |                                                                          |      |
| 40 |                           |                                                                          |      |
| 41 | Allocation: sequence      | <a href="#">#16a</a> Method of generating the allocation sequence (eg,   | 5    |
| 42 | generation                | computer-generated random numbers), and list of any                      |      |
| 43 |                           | factors for stratification. To reduce predictability of a                |      |
| 44 |                           | random sequence, details of any planned restriction                      |      |
| 45 |                           | (eg, blocking) should be provided in a separate                          |      |
| 46 |                           | document that is unavailable to those who enrol                          |      |
| 47 |                           | participants or assign interventions                                     |      |
| 48 |                           |                                                                          |      |
| 49 |                           |                                                                          |      |
| 50 |                           |                                                                          |      |
| 51 |                           |                                                                          |      |
| 52 |                           |                                                                          |      |
| 53 |                           |                                                                          |      |
| 54 |                           |                                                                          |      |
| 55 |                           |                                                                          |      |
| 56 |                           |                                                                          |      |
| 57 |                           |                                                                          |      |
| 58 |                           |                                                                          |      |
| 59 |                           |                                                                          |      |
| 60 |                           |                                                                          |      |

|    |                      |                      |                                                              |    |
|----|----------------------|----------------------|--------------------------------------------------------------|----|
| 1  | Allocation           | <a href="#">#16b</a> | Mechanism of implementing the allocation sequence            | 5  |
| 2  |                      |                      |                                                              |    |
| 3  | concealment          |                      | (eg, central telephone; sequentially numbered,               |    |
| 4  |                      |                      |                                                              |    |
| 5  | mechanism            |                      | opaque, sealed envelopes), describing any steps to           |    |
| 6  |                      |                      |                                                              |    |
| 7  |                      |                      |                                                              |    |
| 8  |                      |                      | conceal the sequence until interventions are assigned        |    |
| 9  |                      |                      |                                                              |    |
| 10 |                      |                      |                                                              |    |
| 11 | Allocation:          | <a href="#">#16c</a> | Who will generate the allocation sequence, who will          | 5  |
| 12 |                      |                      |                                                              |    |
| 13 | implementation       |                      | enrol participants, and who will assign participants to      |    |
| 14 |                      |                      |                                                              |    |
| 15 |                      |                      |                                                              |    |
| 16 |                      |                      | interventions                                                |    |
| 17 |                      |                      |                                                              |    |
| 18 |                      |                      |                                                              |    |
| 19 | Blinding (masking)   | <a href="#">#17a</a> | Who will be blinded after assignment to interventions        | 5  |
| 20 |                      |                      |                                                              |    |
| 21 |                      |                      | (eg, trial participants, care providers, outcome             |    |
| 22 |                      |                      |                                                              |    |
| 23 |                      |                      | assessors, data analysts), and how                           |    |
| 24 |                      |                      |                                                              |    |
| 25 |                      |                      |                                                              |    |
| 26 | Blinding (masking):  | <a href="#">#17b</a> | If blinded, circumstances under which unblinding is          | 5  |
| 27 |                      |                      |                                                              |    |
| 28 | emergency            |                      | permissible, and procedure for revealing a participant's     |    |
| 29 |                      |                      |                                                              |    |
| 30 | unblinding           |                      | allocated intervention during the trial                      |    |
| 31 |                      |                      |                                                              |    |
| 32 |                      |                      |                                                              |    |
| 33 |                      |                      |                                                              |    |
| 34 | <b>Methods: Data</b> |                      |                                                              |    |
| 35 |                      |                      |                                                              |    |
| 36 | collection,          |                      |                                                              |    |
| 37 |                      |                      |                                                              |    |
| 38 | management, and      |                      |                                                              |    |
| 39 |                      |                      |                                                              |    |
| 40 | analysis             |                      |                                                              |    |
| 41 |                      |                      |                                                              |    |
| 42 |                      |                      |                                                              |    |
| 43 |                      |                      |                                                              |    |
| 44 | Data collection plan | <a href="#">#18a</a> | Plans for assessment and collection of outcome,              | 11 |
| 45 |                      |                      |                                                              |    |
| 46 |                      |                      | baseline, and other trial data, including any related        |    |
| 47 |                      |                      |                                                              |    |
| 48 |                      |                      | processes to promote data quality (eg, duplicate             |    |
| 49 |                      |                      |                                                              |    |
| 50 |                      |                      | measurements, training of assessors) and a                   |    |
| 51 |                      |                      |                                                              |    |
| 52 |                      |                      |                                                              |    |
| 53 |                      |                      | description of study instruments (eg, questionnaires,        |    |
| 54 |                      |                      |                                                              |    |
| 55 |                      |                      | laboratory tests) along with their reliability and validity, |    |
| 56 |                      |                      |                                                              |    |
| 57 |                      |                      |                                                              |    |
| 58 |                      |                      |                                                              |    |
| 59 |                      |                      |                                                              |    |
| 60 |                      |                      |                                                              |    |

|    |                            |                                                                             |       |
|----|----------------------------|-----------------------------------------------------------------------------|-------|
| 1  |                            | if known. Reference to where data collection forms can                      |       |
| 2  |                            |                                                                             |       |
| 3  |                            | be found, if not in the protocol                                            |       |
| 4  |                            |                                                                             |       |
| 5  |                            |                                                                             |       |
| 6  | Data collection plan:      | <a href="#">#18b</a> Plans to promote participant retention and complete    | 12    |
| 7  |                            |                                                                             |       |
| 8  | retention                  | follow-up, including list of any outcome data to be                         |       |
| 9  |                            |                                                                             |       |
| 10 |                            | collected for participants who discontinue or deviate                       |       |
| 11 |                            |                                                                             |       |
| 12 |                            | from intervention protocols                                                 |       |
| 13 |                            |                                                                             |       |
| 14 |                            |                                                                             |       |
| 15 | Data management            | <a href="#">#19</a> Plans for data entry, coding, security, and storage,    | 11    |
| 16 |                            |                                                                             |       |
| 17 |                            | including any related processes to promote data                             |       |
| 18 |                            |                                                                             |       |
| 19 |                            | quality (eg, double data entry; range checks for data                       |       |
| 20 |                            |                                                                             |       |
| 21 |                            | values). Reference to where details of data                                 |       |
| 22 |                            |                                                                             |       |
| 23 |                            | management procedures can be found, if not in the                           |       |
| 24 |                            |                                                                             |       |
| 25 |                            | protocol                                                                    |       |
| 26 |                            |                                                                             |       |
| 27 |                            |                                                                             |       |
| 28 |                            |                                                                             |       |
| 29 |                            |                                                                             |       |
| 30 | Statistics: outcomes       | <a href="#">#20a</a> Statistical methods for analysing primary and          | 11    |
| 31 |                            |                                                                             |       |
| 32 |                            | secondary outcomes. Reference to where other details                        |       |
| 33 |                            |                                                                             |       |
| 34 |                            | of the statistical analysis plan can be found, if not in                    |       |
| 35 |                            |                                                                             |       |
| 36 |                            | the protocol                                                                |       |
| 37 |                            |                                                                             |       |
| 38 |                            |                                                                             |       |
| 39 |                            |                                                                             |       |
| 40 | Statistics: additional     | <a href="#">#20b</a> Methods for any additional analyses (eg, subgroup and  | 11-12 |
| 41 |                            |                                                                             |       |
| 42 | analyses                   | adjusted analyses)                                                          |       |
| 43 |                            |                                                                             |       |
| 44 |                            |                                                                             |       |
| 45 | Statistics: analysis       | <a href="#">#20c</a> Definition of analysis population relating to protocol | 11-12 |
| 46 |                            |                                                                             |       |
| 47 | population and             | non-adherence (eg, as randomised analysis), and any                         |       |
| 48 |                            |                                                                             |       |
| 49 | missing data               | statistical methods to handle missing data (eg, multiple                    |       |
| 50 |                            |                                                                             |       |
| 51 |                            | imputation)                                                                 |       |
| 52 |                            |                                                                             |       |
| 53 |                            |                                                                             |       |
| 54 |                            |                                                                             |       |
| 55 | <b>Methods: Monitoring</b> |                                                                             |       |
| 56 |                            |                                                                             |       |
| 57 |                            |                                                                             |       |
| 58 |                            |                                                                             |       |
| 59 |                            |                                                                             |       |
| 60 |                            |                                                                             |       |



|    |                      |                      |                                                          |    |
|----|----------------------|----------------------|----------------------------------------------------------|----|
| 1  | Data monitoring:     | <a href="#">#21a</a> | Composition of data monitoring committee (DMC);          | 11 |
| 2  |                      |                      |                                                          |    |
| 3  | formal committee     |                      | summary of its role and reporting structure; statement   |    |
| 4  |                      |                      |                                                          |    |
| 5  |                      |                      | of whether it is independent from the sponsor and        |    |
| 6  |                      |                      | competing interests; and reference to where further      |    |
| 7  |                      |                      | details about its charter can be found, if not in the    |    |
| 8  |                      |                      | protocol. Alternatively, an explanation of why a DMC is  |    |
| 9  |                      |                      | not needed                                               |    |
| 10 |                      |                      |                                                          |    |
| 11 |                      |                      |                                                          |    |
| 12 |                      |                      |                                                          |    |
| 13 |                      |                      |                                                          |    |
| 14 |                      |                      |                                                          |    |
| 15 |                      |                      |                                                          |    |
| 16 |                      |                      |                                                          |    |
| 17 |                      |                      |                                                          |    |
| 18 | Data monitoring:     | <a href="#">#21b</a> | Description of any interim analyses and stopping         | NA |
| 19 |                      |                      |                                                          |    |
| 20 | interim analysis     |                      | guidelines, including who will have access to these      |    |
| 21 |                      |                      | interim results and make the final decision to terminate |    |
| 22 |                      |                      | the trial                                                |    |
| 23 |                      |                      |                                                          |    |
| 24 |                      |                      |                                                          |    |
| 25 |                      |                      |                                                          |    |
| 26 |                      |                      |                                                          |    |
| 27 |                      |                      |                                                          |    |
| 28 | Harms                | <a href="#">#22</a>  | Plans for collecting, assessing, reporting, and          | 10 |
| 29 |                      |                      | managing solicited and spontaneously reported            |    |
| 30 |                      |                      | adverse events and other unintended effects of trial     |    |
| 31 |                      |                      | interventions or trial conduct                           |    |
| 32 |                      |                      |                                                          |    |
| 33 |                      |                      |                                                          |    |
| 34 |                      |                      |                                                          |    |
| 35 |                      |                      |                                                          |    |
| 36 |                      |                      |                                                          |    |
| 37 |                      |                      |                                                          |    |
| 38 | Auditing             | <a href="#">#23</a>  | Frequency and procedures for auditing trial conduct, if  | 10 |
| 39 |                      |                      | any, and whether the process will be independent from    |    |
| 40 |                      |                      | investigators and the sponsor                            |    |
| 41 |                      |                      |                                                          |    |
| 42 |                      |                      |                                                          |    |
| 43 |                      |                      |                                                          |    |
| 44 |                      |                      |                                                          |    |
| 45 | <b>Ethics and</b>    |                      |                                                          |    |
| 46 |                      |                      |                                                          |    |
| 47 | <b>dissemination</b> |                      |                                                          |    |
| 48 |                      |                      |                                                          |    |
| 49 |                      |                      |                                                          |    |
| 50 |                      |                      |                                                          |    |
| 51 | Research ethics      | <a href="#">#24</a>  | Plans for seeking research ethics committee /            | 10 |
| 52 |                      |                      |                                                          |    |
| 53 | approval             |                      | institutional review board (REC / IRB) approval          |    |
| 54 |                      |                      |                                                          |    |
| 55 |                      |                      |                                                          |    |
| 56 |                      |                      |                                                          |    |
| 57 |                      |                      |                                                          |    |
| 58 |                      |                      |                                                          |    |
| 59 |                      |                      |                                                          |    |
| 60 |                      |                      |                                                          |    |

|    |                    |                      |                                                            |    |
|----|--------------------|----------------------|------------------------------------------------------------|----|
| 1  | Protocol           | <a href="#">#25</a>  | Plans for communicating important protocol                 | 10 |
| 2  |                    |                      |                                                            |    |
| 3  | amendments         |                      | modifications (eg, changes to eligibility criteria,        |    |
| 4  |                    |                      | outcomes, analyses) to relevant parties (eg,               |    |
| 5  |                    |                      | investigators, REC / IRBs, trial participants, trial       |    |
| 6  |                    |                      | registries, journals, regulators)                          |    |
| 7  |                    |                      |                                                            |    |
| 8  |                    |                      |                                                            |    |
| 9  |                    |                      |                                                            |    |
| 10 |                    |                      |                                                            |    |
| 11 |                    |                      |                                                            |    |
| 12 |                    |                      |                                                            |    |
| 13 | Consent or assent  | <a href="#">#26a</a> | Who will obtain informed consent or assent from            | 5  |
| 14 |                    |                      | potential trial participants or authorised surrogates,     |    |
| 15 |                    |                      | and how (see Item 32)                                      |    |
| 16 |                    |                      |                                                            |    |
| 17 |                    |                      |                                                            |    |
| 18 |                    |                      |                                                            |    |
| 19 |                    |                      |                                                            |    |
| 20 |                    |                      |                                                            |    |
| 21 | Consent or assent: | <a href="#">#26b</a> | Additional consent provisions for collection and use of    | 5  |
| 22 | ancillary studies  |                      | participant data and biological specimens in ancillary     |    |
| 23 |                    |                      | studies, if applicable                                     |    |
| 24 |                    |                      |                                                            |    |
| 25 |                    |                      |                                                            |    |
| 26 |                    |                      |                                                            |    |
| 27 |                    |                      |                                                            |    |
| 28 | Confidentiality    | <a href="#">#27</a>  | How personal information about potential and enrolled      | 13 |
| 29 |                    |                      | participants will be collected, shared, and maintained     |    |
| 30 |                    |                      | in order to protect confidentiality before, during, and    |    |
| 31 |                    |                      | after the trial                                            |    |
| 32 |                    |                      |                                                            |    |
| 33 |                    |                      |                                                            |    |
| 34 |                    |                      |                                                            |    |
| 35 |                    |                      |                                                            |    |
| 36 |                    |                      |                                                            |    |
| 37 |                    |                      |                                                            |    |
| 38 | Declaration of     | <a href="#">#28</a>  | Financial and other competing interests for principal      | 17 |
| 39 | interests          |                      | investigators for the overall trial and each study site    |    |
| 40 |                    |                      |                                                            |    |
| 41 |                    |                      |                                                            |    |
| 42 |                    |                      |                                                            |    |
| 43 |                    |                      |                                                            |    |
| 44 | Data access        | <a href="#">#29</a>  | Statement of who will have access to the final trial       | 11 |
| 45 |                    |                      | dataset, and disclosure of contractual agreements that     |    |
| 46 |                    |                      | limit such access for investigators                        |    |
| 47 |                    |                      |                                                            |    |
| 48 |                    |                      |                                                            |    |
| 49 |                    |                      |                                                            |    |
| 50 |                    |                      |                                                            |    |
| 51 | Ancillary and post | <a href="#">#30</a>  | Provisions, if any, for ancillary and post-trial care, and | NA |
| 52 | trial care         |                      | for compensation to those who suffer harm from trial       |    |
| 53 |                    |                      | participation                                              |    |
| 54 |                    |                      |                                                            |    |
| 55 |                    |                      |                                                            |    |
| 56 |                    |                      |                                                            |    |
| 57 |                    |                      |                                                            |    |
| 58 |                    |                      |                                                            |    |
| 59 |                    |                      |                                                            |    |
| 60 |                    |                      |                                                            |    |

|    |                       |                      |                                                           |            |
|----|-----------------------|----------------------|-----------------------------------------------------------|------------|
| 1  | Dissemination         | <a href="#">#31a</a> | Plans for investigators and sponsor to communicate        | 13         |
| 2  |                       |                      |                                                           |            |
| 3  | policy: trial results |                      | trial results to participants, healthcare professionals,  |            |
| 4  |                       |                      | the public, and other relevant groups (eg, via            |            |
| 5  |                       |                      | publication, reporting in results databases, or other     |            |
| 6  |                       |                      | data sharing arrangements), including any publication     |            |
| 7  |                       |                      | restrictions                                              |            |
| 8  |                       |                      |                                                           |            |
| 9  |                       |                      |                                                           |            |
| 10 |                       |                      |                                                           |            |
| 11 |                       |                      |                                                           |            |
| 12 |                       |                      |                                                           |            |
| 13 |                       |                      |                                                           |            |
| 14 |                       |                      |                                                           |            |
| 15 | Dissemination         | <a href="#">#31b</a> | Authorship eligibility guidelines and any intended use    | NA         |
| 16 |                       |                      |                                                           |            |
| 17 | policy: authorship    |                      | of professional writers                                   |            |
| 18 |                       |                      |                                                           |            |
| 19 |                       |                      |                                                           |            |
| 20 |                       |                      |                                                           |            |
| 21 | Dissemination         | <a href="#">#31c</a> | Plans, if any, for granting public access to the full     | 13         |
| 22 |                       |                      |                                                           |            |
| 23 | policy: reproducible  |                      | protocol, participant-level dataset, and statistical code |            |
| 24 |                       |                      |                                                           |            |
| 25 | research              |                      |                                                           |            |
| 26 |                       |                      |                                                           |            |
| 27 |                       |                      |                                                           |            |
| 28 |                       |                      |                                                           |            |
| 29 | <b>Appendices</b>     |                      |                                                           |            |
| 30 |                       |                      |                                                           |            |
| 31 |                       |                      |                                                           |            |
| 32 | Informed consent      | <a href="#">#32</a>  | Model consent form and other related documentation        | Supplement |
| 33 |                       |                      |                                                           |            |
| 34 | materials             |                      | given to participants and authorised surrogates           | 1          |
| 35 |                       |                      |                                                           |            |
| 36 |                       |                      |                                                           |            |
| 37 | Biological specimens  | <a href="#">#33</a>  | Plans for collection, laboratory evaluation, and storage  | 10         |
| 38 |                       |                      |                                                           |            |
| 39 |                       |                      | of biological specimens for genetic or molecular          |            |
| 40 |                       |                      | analysis in the current trial and for future use in       |            |
| 41 |                       |                      | ancillary studies, if applicable                          |            |
| 42 |                       |                      |                                                           |            |
| 43 |                       |                      |                                                           |            |
| 44 |                       |                      |                                                           |            |
| 45 |                       |                      |                                                           |            |
| 46 |                       |                      |                                                           |            |

## Notes:

- 32: Supplement 1 The SPIRIT checklist is distributed under the terms of the Creative Commons Attribution License CC-BY-ND 3.0. This checklist was completed on 26. June 2020 using <https://www.goodreports.org/>, a tool made by the [EQUATOR Network](#) in collaboration with [Penelope.ai](#)

# BMJ Open

## Standard Maintenance Therapy versus Local Consolidative Radiation Therapy and Standard Maintenance Therapy in 1-5 sites of Oligometastatic Non-Small Cell Lung Cancer: A Study Protocol of Phase III Randomized Controlled Trial

|                                 |                                                                                                                                                                                                                                                                                                                                                                                                                                                                                                                                                                                                                                                      |
|---------------------------------|------------------------------------------------------------------------------------------------------------------------------------------------------------------------------------------------------------------------------------------------------------------------------------------------------------------------------------------------------------------------------------------------------------------------------------------------------------------------------------------------------------------------------------------------------------------------------------------------------------------------------------------------------|
| Journal:                        | <i>BMJ Open</i>                                                                                                                                                                                                                                                                                                                                                                                                                                                                                                                                                                                                                                      |
| Manuscript ID                   | bmjopen-2020-043628.R1                                                                                                                                                                                                                                                                                                                                                                                                                                                                                                                                                                                                                               |
| Article Type:                   | Protocol                                                                                                                                                                                                                                                                                                                                                                                                                                                                                                                                                                                                                                             |
| Date Submitted by the Author:   | 07-Dec-2020                                                                                                                                                                                                                                                                                                                                                                                                                                                                                                                                                                                                                                          |
| Complete List of Authors:       | Tibdewal, Anil; Tata Memorial Hospital, Radiation Oncology<br>Agarwal, JaiPrakash; Tata Memorial Hospital, Radiation Oncology<br>Srinivasan, Shashank; Tata Memorial Hospital, Radiation Oncology<br>Mummudi, Naveen; Tata Memorial Hospital, Radiation Oncology<br>Noronha, Vanita; Tata Memorial Hospital, Medical Oncology<br>Prabhash, Kumar; Tata Memorial Hospital, Medical Oncology<br>Patil, Vijay ; Tata Memorial Hospital, Medical Oncology<br>Purandare, Nilendu; Tata Memorial Hospital, Nuclear Medicine<br>Janu, Amit; Tata Memorial Hospital, Radiodiagnosis<br>Kannan, Sadhna; Tata Memorial Hospital, Clinical Research Secretariat |
| <b>Primary Subject Heading</b>: | Oncology                                                                                                                                                                                                                                                                                                                                                                                                                                                                                                                                                                                                                                             |
| Secondary Subject Heading:      | Oncology, Qualitative research, Respiratory medicine                                                                                                                                                                                                                                                                                                                                                                                                                                                                                                                                                                                                 |
| Keywords:                       | Radiation oncology < RADIOTHERAPY, CHEMOTHERAPY, Respiratory tract tumours < THORACIC MEDICINE                                                                                                                                                                                                                                                                                                                                                                                                                                                                                                                                                       |
|                                 |                                                                                                                                                                                                                                                                                                                                                                                                                                                                                                                                                                                                                                                      |

SCHOLARONE™  
Manuscripts



I, the Submitting Author has the right to grant and does grant on behalf of all authors of the Work (as defined in the below author licence), an exclusive licence and/or a non-exclusive licence for contributions from authors who are: i) UK Crown employees; ii) where BMJ has agreed a CC-BY licence shall apply, and/or iii) in accordance with the terms applicable for US Federal Government officers or employees acting as part of their official duties; on a worldwide, perpetual, irrevocable, royalty-free basis to BMJ Publishing Group Ltd ("BMJ") its licensees and where the relevant Journal is co-owned by BMJ to the co-owners of the Journal, to publish the Work in this journal and any other BMJ products and to exploit all rights, as set out in our [licence](#).

The Submitting Author accepts and understands that any supply made under these terms is made by BMJ to the Submitting Author unless you are acting as an employee on behalf of your employer or a postgraduate student of an affiliated institution which is paying any applicable article publishing charge ("APC") for Open Access articles. Where the Submitting Author wishes to make the Work available on an Open Access basis (and intends to pay the relevant APC), the terms of reuse of such Open Access shall be governed by a Creative Commons licence – details of these licences and which [Creative Commons](#) licence will apply to this Work are set out in our licence referred to above.

Other than as permitted in any relevant BMJ Author's Self Archiving Policies, I confirm this Work has not been accepted for publication elsewhere, is not being considered for publication elsewhere and does not duplicate material already published. I confirm all authors consent to publication of this Work and authorise the granting of this licence.

## Title Page

**Title: Standard Maintenance Therapy versus Local Consolidative Radiation Therapy and Standard Maintenance Therapy in 1-5 sites of Oligometastatic Non-Small Cell Lung Cancer: A Study Protocol of Phase III Randomized Controlled Trial**

**Authors:** Dr. Anil Tibdewal<sup>1\*</sup>, Dr. Jaiprakash Agarwal<sup>1</sup>, Dr. Shashank Srinivasan<sup>1</sup>, Dr. Naveen Mummudi<sup>1</sup>, Dr. Vanita Noronha<sup>2</sup>, Dr. Kumar Prabhash<sup>2</sup>, Dr. Vijay Patil<sup>2</sup>, Dr. Nilendu Purandare<sup>3</sup>, Dr. Amit Janu<sup>4</sup>, Dr. Sadhna Kannan<sup>5</sup>.

<sup>1</sup> Department of Radiation Oncology, Tata Memorial Hospital, Homi Bhabha National Institute, Mumbai, India.

<sup>2</sup> Department of Medical Oncology, Tata Memorial Hospital, Homi Bhabha National Institute, Mumbai, India.

<sup>3</sup> Department of Nuclear Medicine, Tata Memorial Hospital, Homi Bhabha National Institute, Mumbai, India.

<sup>4</sup> Department of Radiodiagnosis, Tata Memorial Hospital, Homi Bhabha National Institute, Mumbai, India.

<sup>5</sup> Clinical Research Secretariat, Tata Memorial Hospital, Homi Bhabha National Institute, Mumbai, India.

**\*Corresponding Author: Dr. Anil Tibdewal**

Assistant Professor,

Department of Radiation Oncology

Tata Memorial Centre, Mumbai, India

Email: [aniltibdewal@gmail.com](mailto:aniltibdewal@gmail.com)

Telephone: [91-22-2417 7030](tel:91-22-24177030)

## Abstract

**Introduction:** Two-phase II randomized studies have shown a significant benefit of local consolidation therapy in oligometastatic NSCLC. This phase III RCT will evaluate the efficacy of local consolidation radiation therapy in OM NSCLC after completion of initial systemic therapy.

**Methods and Analysis:** This is a single-center phase III randomized controlled trial of OM NSCLC patients. One hundred ninety patients will undergo 1:1 randomization to either standard maintenance therapy (Control Arm) or local consolidation radiation therapy and standard maintenance therapy (Experimental Arm). Patients will be stratified into the number of OM sites (1-2 vs 3-5), nodal metastases (N0-N1 vs N2-N3) and presence or absence of brain metastases. Stereotactic body radiation therapy (SBRT) to all the oligometastatic sites and definitive RT to primary disease will be given in the experimental arm. The primary endpoint is overall survival and secondary endpoints include progression-free survival, local control of OM sites, new distant metastases free survival, objective response rate, toxicity and quality of life. Translation endpoint include circulating tumor cells and radiomics using texture analysis.

**Ethics and Dissemination:** All patients will be provided with a written informed consent form which needs to be signed before randomization. The study is approved by the institutional ethics committee-II (project number 3445) and registered with Clinical Trials Registry – India, CTRI/2020/04/024761, dated April 21<sup>st</sup>, 2020.

**Keywords:** Local consolidation radiation therapy, Non-small cell lung cancer, Oligometastases, Stereotactic body radiation therapy, Quality of life.

### Strengths and Limitations of this study

- Used consensus definition for number of OM sites
- Randomization after initial systemic chemotherapy if no progression
- Practical eligibility criteria for timely recruitment
- SBRT to all oligometastatic sites
- Translational endpoints of circulating tumor cells and radiomics analysis

## Introduction

Systemic therapy is the standard of care for patients with metastatic non-small cell lung cancer (NSCLC). Tyrosine kinase inhibitors (TKI) have significantly improved survival outcomes for patients with an actionable oncogene mutation like epidermal growth factor receptor (EGFR) or anaplastic lymphoma kinase (ALK) [1–4]. In patients with programmed death/ ligand receptor (PD-1/PD-L1) expression, immune checkpoint inhibitors (ICI) also improves outcomes compared to systemic therapy alone [5,6]. Patients who do not have oncogene mutations and are not eligible for immunotherapy have a worse prognosis with median OS ranging from 10-13 months as compared to median OS of 18-26 months for patients treated with TKI or immunotherapy[4,6].

Metastatic NSCLC with limited sites of metastases referred to as oligometastases (OM) has shown better prognosis than those with widespread metastases[7,8]. The OM state was proposed as an intermediate stage of cancer with a spread between localized disease and widespread metastases[9,10]. The significance of the OM paradigm is that selected patients could be cured with radical local therapies[11]. There has been much debate as to the definition of oligometastatic disease in NSCLC. Recently, the European consensus definition for synchronous oligometastatic NSCLC was published. These include patients with a maximum of five metastatic lesions involving a maximum of three organs and all can be treated with radical local ablative therapy [12,13]. It is recommended not to consider histology and genomic background. (ref to be added).

The question remains why oligometastatic disease should behave differently than widespread metastatic disease. Patterns of failure analyses from limited metastatic NSCLC suggest that disease progression most often occurs at sites of existing disease at baseline rather than at new sites[14–16]. Hence, aggressive treatment of limited metastatic sites could potentially remove the dominant disease that could seed other sites in the future. Various retrospective studies have proven the role of definitive local therapy in oligometastases[17,18]. Two-phase II studies performed by Gomez et al. and Iyengar et al. showed that local consolidative therapy in addition to systemic therapy has a role in oligometastatic NSCLC. Gomez et al. randomized 1-3 sites of OM NSCLC patients to local consolidative therapy with or without maintenance therapy or to maintenance treatment alone. They showed a significant median PFS benefit in favor of local consolidative therapy (11.9 months vs 3.9 months,  $p=0.005$ ). Long term results also showed an OS benefit of 41 months vs 17 months [19,20]. Iyengar et al. randomized 29



1  
2  
3 patients to maintenance chemotherapy (CT) alone vs SABR followed by maintenance  
4 chemotherapy. As opposed to the study by Gomez et al. they enrolled patients with negative  
5 EGFR/ALK mutations and up to 5 metastatic sites. They showed a significant improvement in  
6 PFS with SABR (9.7 months vs 3.5 months,  $p=0.01$ ). The SINDAS trial is the only phase III  
7 randomized trial with results presented at the recent ASCO meeting. The study randomized  
8 patient with EGFR mutation and  $\leq 5$  OM sites to either TKI alone or SBRT plus TKIs. The  
9 study showed a significant median PFS (20.2 vs 12.5 months,  $p<0.001$ ) and OS (25.5 vs 17.4  
10 months,  $p<0.001$ ) respectively [21].  
11

12 Although there has been promising data for the addition of local consolidative therapy to  
13 standard systemic therapy for oligometastatic NSCLC, these studies remain nondefinitive as  
14 they included small patient numbers. The only reported phase III RCT has exclusively selected  
15 patients with EGFR mutation[21]. These patients have a different natural history and outcomes  
16 for those who do not have EGFR mutations [22]. Hence, we initiated a phase III RCT to  
17 ascertain the role of addition of local consolidative radiation therapy (LCRT) to standard  
18 maintenance therapy (SMT) in oligometastatic NSCLC patients with up to 5 metastatic lesions  
19 and negative oncogene mutations.  
20  
21  
22  
23  
24  
25  
26  
27  
28  
29  
30  
31

### 32 **Materials and Methods**

33 This study is designed as a single institution, open-label, phase-III RCT, approved by the  
34 institutional ethics committee-II (IEC-II) (project number 3445). The study schema is shown  
35 in figure 1. All NSCLC patients with up to 5 metastatic sites at presentation will be screened  
36 for this study. Patients who have completed standard systemic therapy and response imaging  
37 shows no progressive disease (PD) as per Response Evaluation Criteria in Solid Tumors  
38 (RECIST) version 1.1 will be eligible for this study. If found eligible under eligibility criteria  
39 (Table 1), patients will be explained about the study protocol by the study investigators in their  
40 native language and interested patients will be given an IEC approved written informed consent  
41 document available in English, Hindi and Marathi language (Supplement file 1).  
42  
43  
44  
45  
46  
47  
48  
49

50 Patients will be randomized in a 1:1 ratio to SMT alone (control arm), and LCRT + SMT  
51 (experimental arm). Patients will be stratified by the number of metastatic sites (1-2 vs 3-5),  
52 nodal metastases (N0-N1 vs N2), and brain metastases (present vs absent). Independent  
53 biostatistician of the institute will perform a computer-generated randomization sequence  
54 based on stratification factors. The study is expected to start from Jan 2021 and will continue  
55 for at least 5 years thereafter.  
56  
57  
58  
59  
60

## **Patient and Public involvement**

Patients or the public were not involved in the design, conduct, reporting, or dissemination plans of this study.

## **Objectives and Endpoints**

The primary objective of this study is to assess the efficacy of LCRT after initial systemic therapy in oligometastatic NSCLC patients.

### **Primary Endpoint**

To compare the overall survival (OS) between SMT arm and LCRT+ SMT arm where OS is defined as the time from the date of randomization to the date of death due to any cause.

### **Secondary Endpoints**

1. Progression-free survival (PFS) - the time from the date of randomization until the date of disease progression, or until death in the absence of progression, whichever is earlier.
2. Local control for sites treated with LCRT – defined as the absence of PD (complete response, partial response, or stable disease).
3. New distant metastases free survival (DMFS) - the time from the date of randomization until the emergence of new distant metastases or death, whichever is earlier.
4. Objective response rate (complete response [CR] + partial response [PR])
5. Patient-reported outcomes using the EORTC QOL core questionnaire (QLQ-C30) and the corresponding lung cancer module (QLQ-LC13)
6. Treatment-related toxicity assessed using National Cancer Institute Common Toxicity Criteria (NCI-CTC) version 5.

### **Exploratory endpoints**

1. Textural features of primary and metastatic sites using the TexRAD software (TexRAD Ltd. Cambridge UK)
2. Differences in the textural features between pre and post-treatment images in the experimental arm and their correlation with survival outcomes.

3. Correlation of circulating tumor cells (CTCs) with the survival outcomes.

**Table 1: Eligibility criteria for the study**

| <b>Inclusion criteria:</b>                                                                                                                                                                                                                                                                                                                                                                                                                                                                                                                                                                                                                                                                                                                                                                                                                                                                                                                                                                                                                                                                                                                                                                                                                                                                                                                                                                                                                                      | <b>Exclusion criteria:</b>                                                                                                                                                                                                                                                                                                                                                                                                                                                                                                                                                                                                                                                                                                                                                                                                                                                                                                                                                                                                                                                                                                                                                                                                        |
|-----------------------------------------------------------------------------------------------------------------------------------------------------------------------------------------------------------------------------------------------------------------------------------------------------------------------------------------------------------------------------------------------------------------------------------------------------------------------------------------------------------------------------------------------------------------------------------------------------------------------------------------------------------------------------------------------------------------------------------------------------------------------------------------------------------------------------------------------------------------------------------------------------------------------------------------------------------------------------------------------------------------------------------------------------------------------------------------------------------------------------------------------------------------------------------------------------------------------------------------------------------------------------------------------------------------------------------------------------------------------------------------------------------------------------------------------------------------|-----------------------------------------------------------------------------------------------------------------------------------------------------------------------------------------------------------------------------------------------------------------------------------------------------------------------------------------------------------------------------------------------------------------------------------------------------------------------------------------------------------------------------------------------------------------------------------------------------------------------------------------------------------------------------------------------------------------------------------------------------------------------------------------------------------------------------------------------------------------------------------------------------------------------------------------------------------------------------------------------------------------------------------------------------------------------------------------------------------------------------------------------------------------------------------------------------------------------------------|
| <ol style="list-style-type: none"> <li>1) Age &gt; 18 years</li> <li>2) ECOG performance status of 0-2</li> <li>3) Pathologically proven diagnosis of NSCLC</li> <li>4) 1-5 sites of metastatic disease not including the primary tumor and regional nodes (<math>\leq 3</math> metastatic lesions in one organ will be eligible)</li> <li>5) Patients should have received at least 4-6 cycles of systemic therapy without progression on response Imaging</li> <li>6) Patients suitable for definitive therapy to the primary disease</li> <li>7) All the oligometastatic lesions should be radiologically visible and suitable for SBRT</li> <li>8) Adequate end organ function with CBC/differential obtained within 15 days before registration on the study, with adequate bone marrow function defined as follows: <ul style="list-style-type: none"> <li>• Absolute neutrophil count (ANC) <math>\geq 500</math> cells/mm<sup>3</sup></li> <li>• Platelets <math>\geq 50,000</math> cells/mm<sup>3</sup></li> <li>• Hemoglobin <math>\geq 8.0</math> g/dl (Use of transfusion or other intervention to achieve Hgb <math>\geq 8.0</math> g/dl is acceptable);</li> </ul> </li> <li>9) Negative serum or urine pregnancy test for females of child-bearing potential, within 14 days before study registration</li> <li>10) Patients willing for written informed consent and must be willing to comply with the specified follow up schedule</li> </ol> | <ol style="list-style-type: none"> <li>1) Progressive disease after initial systemic therapy</li> <li>2) Positive oncogene mutations (EGFR/ALK/ROS)</li> <li>3) More than 5 sites of oligo metastases</li> <li>4) Metastatic lesion size &gt;5 cm</li> <li>5) More than three metastatic lesions in one organ</li> <li>6) Malignant peritoneal disease</li> <li>7) Malignant pleural effusion</li> <li>8) Leptomeningeal disease</li> <li>9) Brain metastases in the brain stem</li> <li>10) Clinical or radiological evidence of spinal cord compression or metastases within 2 mm of the spinal cord on MRI</li> <li>11) Severe, active co-morbidity defined as follows: <ul style="list-style-type: none"> <li>• Unstable angina and/or congestive heart failure requiring hospitalization within the last 6 months</li> <li>• Transmural myocardial infarction within the last 6 months</li> <li>• Chronic Obstructive Pulmonary Disease exacerbation or other respiratory illness requiring hospitalization or precluding study therapy at the time of registration</li> </ul> </li> <li>12) Prior history of radiation therapy to the thorax</li> <li>13) Previous history of malignancy within the last 3 years</li> </ol> |

### Specific scenarios for Inclusion

- 1) Patients who underwent ablative RT or surgery or RFA for metastatic sites at presentation or during systemic therapy will be eligible provided the site is under control and the total number of oligometastatic sites at the time of study entry (treated site included) is  $\leq 5$ .
- 2) Palliative RT for symptomatic bony metastases will be eligible provided the treated site is under control and further ablative doses of radiation can be delivered.
- 3) Patients with vertebral metastases who underwent surgical decompression, or stabilization followed by palliative RT will be eligible in the study provided the treated site is under control and the patient has  $\leq 5$  sites (treated site included).

### Pre-randomization assessment

Eligible patients will undergo response assessment PET-CT or contrast-enhanced CT of thorax, abdomen, and pelvis after the completion of 4-6 cycles of standard systemic therapy. Complete history and thorough physical examination including PS assessment, baseline laboratory tests (including but not limited to complete blood count, renal function tests and liver function tests), 2D Echocardiography, and gadolinium contrast-enhanced MR Brain if not done earlier. Patients who do not have a progressive disease as per RECIST 1.1 will be eligible.

### Defining the number of Oligometastases

All metastatic sites at presentation and on follow up imaging will be confirmed by an experienced radiologist and will be discussed in multidisciplinary joint clinics. The involvement of adjacent vertebrae by direct extension would be counted as one site and not two sites of metastases. Indeterminate parenchymal lung nodule or any suspicious lung lesion on baseline imaging will be again evaluated on the response imaging for its metastatic confirmation. If required, biopsy confirmation will be preferred but is not mandatory. Primary tumor and regional nodes' feasibility for definitive RT will be assessed by the study investigators before randomization. Non-regional nodes will be counted as an individual metastatic site. Patients who have received palliative RT for symptomatic bone and brain metastases during the initial period will be evaluated for local control of those sites. Additional ablative doses will be decided as per the study investigators' discretion.

### Control Arm – Standard Maintenance Therapy

All patients in this arm will receive standard maintenance therapy which includes chemotherapy, immunotherapy, or observation. SMT will be decided by the treating medical oncologist. Maintenance systemic therapy should start within 4-8 weeks of randomization. Palliative radiation therapy to existing metastatic sites in this arm will be done on clinical or radiological worsening. Acceptable RT doses include 8 Gy times one or two fractions or 20 Gy in five fractions. No ablative doses to metastatic sites are allowed in this arm.

### Experimental Arm – Local Consolidative Radiation Therapy + SMT

Patients in this arm will receive LCRT with SBRT to all oligometastatic sites and definitive RT to primary disease including involved regional nodes. SMT will be given as discussed in arm A. LCRT will be started within 4 weeks of randomization. Maintenance systemic therapy can be started concurrently or after completion of LCRT within 4 weeks. SBRT doses are given in Table 2. Definitive radiation for the primary and nodal disease would be done similarly as in locally advanced NSCLC with hypofractionation schedule to a dose of 45-55 Gy in 15-22 fractions. Doses will be decided depending upon normal tissue tolerances and at radiation oncologist's discretion.

**Table 2: LCRT doses for oligometastatic sites**

| Oligometastatic site                       | Location      | Dose per fraction (Gy) | Number of fractions | Total Dose  | Frequency       |
|--------------------------------------------|---------------|------------------------|---------------------|-------------|-----------------|
| <b>Primary (if N0) and Lung metastases</b> | Peripheral    | 12                     | 5                   | 60 Gy       | Alternate day   |
|                                            | Central       | 7.5                    | 8                   | 60 Gy       | Daily/Alternate |
|                                            | Ultra-central | 5                      | 10                  | 50 Gy       | Daily/Alternate |
| <b>Bone</b>                                | Spine         | 8 - 12                 | 3 - 2               | 24 Gy       | Alternate day   |
|                                            | Any other     | 7                      | 5                   | 35 Gy       | Daily/Alternate |
| <b>Brain</b>                               | Single        | 18-24                  | 1                   | 18-24       | Single          |
|                                            | 1-3 lesion    | 18-24 or 5             | 1 or 10             | 18-24 or 50 | Single/Daily    |
| <b>Adrenal</b>                             | NA            | 7 – 10 Gy              | 5                   | 35 – 50 Gy  | Daily/Alternate |
| <b>Liver</b>                               | Any           | 6 – 10 Gy              | 5                   | 30 – 50 Gy  | Daily/Alternate |

### Radiotherapy planning and delivery

1  
2  
3 All patients in the experimental arm will undergo CT-based planning which should completely  
4 cover all the areas of interest so that a composite dose distribution can be created for all  
5 metastatic sites. Ideally, patient position will be preferred to remain the same across all  
6 treatment sites except brain metastases. Four-dimensional CT (4D-CT) will be used to  
7 encompass tumor and organ motion for moving metastatic sites. Target volume delineation will  
8 be done as per the consensus guidelines for individual sites e.g. international spinal consortium  
9 guidelines for spinal metastases [23]. A high precision technique like SBRT will be used for  
10 oligometastatic sites. Treatment planning will be done using intensity-modulated radiation  
11 therapy (IMRT) or volumetric modulated Arc therapy (VMAT).  
12  
13  
14  
15  
16  
17  
18

### 19 **Radiomics**

20  
21 Texture analysis of medical images like CT and MRI assess heterogeneity of tumors and other  
22 benign lesions[24,25]. It evaluates the distribution of grey levels, coarseness, and regularity.  
23 As a radiomics endpoint, texture analysis will be done on pre- and post-treatment imaging and  
24 their significance and correlation will be analysed separately.  
25  
26  
27  
28

### 29 **Circulating Tumor Cells**

30  
31 In this study, the exploratory translational objective is to evaluate the significance of circulating  
32 tumor cells in the blood at baseline and subsequent follow-up. Circulating tumor cells have  
33 been identified as a prognostic marker in different tumor subtypes [26,27]. Serial follow up of  
34 CTCs in blood could predict clinical recurrence earlier than the radiological recurrence.  
35  
36  
37  
38

### 39 **Participant withdrawal/discontinuation:**

40  
41 The principal investigator can discontinue the treatment whenever deemed necessary if the  
42 patient has significant toxicities or in life-threatening clinical scenarios. Patients can withdraw  
43 from the study without giving any reasons, however, reasons for withdrawal would be preferred  
44 for study documentation. Any data prior to withdrawal will be used for the study related  
45 outcome analysis.  
46  
47  
48  
49

### 50 **Safety monitoring:**

51  
52 The data safety monitoring committee of the institute will monitor the progress of the study at  
53 regular intervals. Study modifications/amendments will be informed to IRB for approval, study  
54 sponsors, and will be uploaded in the clinical trials registry-India. All toxicities, treatment  
55  
56  
57  
58  
59  
60

1  
2  
3 interruptions or discontinuation and protocol deviations will be recorded and inform by the  
4 study investigators to the institutional review board as specified by the institutional guidelines.  
5  
6  
7  
8  
9

### 10 **Statistics:**

11  
12 **Randomization:** All eligible patients will be stratified according to the number of metastatic  
13 sites (1-2 vs 3-5), nodal status (N0-N1 vs N2-N3), and brain metastases (present vs absent).  
14 Patients will then undergo 1:1 randomization by an independent biostatistician with permuted  
15 block randomization.  
16  
17  
18

### 19 **Sample size calculation**

20  
21  
22 The results of the phase II study of Gomez et al demonstrated a median OS of 17 months in the  
23 SMT alone arm and 41.2 months in SMT + LCT arm. For this phase III study, we took median  
24 OS of 17 months in the standard arm from Gomez et al and are expecting an increment of 10  
25 months in the experimental arm with hazard ratio of 0.63 based on previous single arm phase  
26 II studies [28,29]. To detect this difference, with 80% power and a two-sided alpha of 0.05,  
27 148 events will be required, 80 in the control arm and 68 in the experimental arm. Assuming a  
28 10% drop out rate, the total sample size required would be 206 (103 in the control arm and 103  
29 in the experimental arm). We intend to accrue 40-45 patients per year for a 5-year accrual  
30 period with a minimum follow up of two years. The total study duration is seven years.  
31  
32  
33  
34  
35  
36  
37

### 38 **Analysis**

39  
40 Study-related data will be collected in an electronic case record form (eCRF) and will be  
41 uploaded in a restricted-access database (REDCap). Data will be available to principal  
42 investigators and the statistical team of the study in a password protected computer folder.  
43 Patient baseline characteristics will be summarized by study arm and control arm. Chi-square  
44 test or Fisher's exact test will be applied to compare patient characteristics between the two  
45 arms. The primary endpoint of OS will be calculated as per the intention-to-treat analysis. OS,  
46 PFS and DMFS will be calculated using the Kaplan-Meier method and log-rank test will be  
47 used for comparison between the groups. Cox proportional hazard regression model will be  
48 used to analyze the effects of factors, in addition to treatment, that may be associated with OS  
49 and PFS. Chi-square test with Pearson's or Fisher's exact test will be used to compare the ORR  
50 between the two treatment arms. A similar test will be used to estimate the incidence of adverse  
51 events in each treatment arm (both acute and chronic toxicities). A  $p\text{-value} \leq 0.05$  in a two-tailed  
52  
53  
54  
55  
56  
57  
58  
59  
60



1  
2  
3 test will be considered statistically significant. Statistical analyses will be performed using  
4 SPSS version 25.0 (Statistical Package for Social Sciences) and STATA version 14.  
5  
6

### 7 **QOL Analysis**

8  
9 The EORTC QLQ-LC13 is a 13-item questionnaire grouped, while the QLQ-C30 comprises a  
10 30-item questionnaire. Raw scores will be standardized by linear transformation such that the  
11 final scores ranged between 0 and 100. Higher scores on the global QOL and functional scales  
12 represent a better QOL, whereas high symptom scale scores indicate significant symptoms or  
13 greater difficulty. If data from one assessment point will be missing, then the last observation  
14 carry forward (LOCF) method will be used to impute the missing subsequent values. To  
15 account for possible bias due to imputation, sensitivity analyses will be performed by  
16 conducting a complete case analysis. Repeated-measures analysis of variance (RM-ANOVA)  
17 will be used to assess the interaction of time and group with time as within-subject factor and  
18 group as a between-subject factor with respect to EORTC QLQ 30 and LC30 from baseline to  
19 till the last follow-up.  
20  
21  
22  
23  
24  
25  
26  
27  
28

### 29 **Follow up evaluation and toxicity assessment**

30  
31 All patients accrued in the control arm will be followed up every 3 monthly ( $\pm$  4 weeks) for the  
32 first 2 years and then 6 monthly ( $\pm$  6 weeks) afterward till 5 years and thereafter annually (Table  
33 3). Patients in the experimental arm during LCRT treatment will be reviewed once weekly for  
34 symptom and acute toxicity assessment if any. Post LCRT completion follows up will be done  
35 similarly as in the control arm. Adherence to protocol treatment and timely follow up of  
36 participants will be encouraged by the study investigators and team members through proper  
37 counselling, resolving queries and by allowing easy access to them. Any serious adverse events  
38 during treatment and at follow up will be documented, informed to IRB, managed  
39 appropriately, and will be followed up till resolution. At each visit, history and physical  
40 examination, ECOG PS, toxicity assessment using NCI CTC v5.0 will be recorded. Acute  
41 toxicity is defined as symptoms occurring within 90 days of the first fraction of radiotherapy.  
42 Late toxicity is defined as symptoms occurring beyond 90 days. Efficacy assessment will be  
43 done with CECT imaging of the disease sites at every follow-up. On equivocal suspicion of  
44 recurrent or PD, PET-CT or biopsy will be done. If biopsy not feasible, repeat imaging will be  
45 done after 4-8 weeks. MRI Brain will be done on clinical suspicion based on neurological  
46 worsening. EORTC QOL questionnaires will be completed by patients at 3, 6, and 12 months.  
47  
48  
49  
50  
51  
52  
53  
54  
55  
56  
57  
58  
59  
60



If symptomatic before the scheduled follow up visit, relevant imaging will be done to rule out progression.

**Table 3: Follow up visits schedule**

| Assessment           | Before randomization     | 1 <sup>st</sup> follow up at 3 months ( $\pm$ 4 weeks) | Every 3 month till 2 years ( $\pm$ 4 weeks) | Six monthly till 5 years ( $\pm$ 6 weeks) |
|----------------------|--------------------------|--------------------------------------------------------|---------------------------------------------|-------------------------------------------|
| Physical examination | x                        | x                                                      | x                                           | x                                         |
| Performance status   | x                        | x                                                      | x                                           | x                                         |
| RO assessment        | x                        | x                                                      | x                                           | x                                         |
| CECT (T+A+P)         | x                        | x                                                      | x                                           | x                                         |
| Toxicity evaluation  | x                        | x                                                      | x                                           | x                                         |
| MRI Brain            | If not done earlier      | As required                                            | As required                                 | As required                               |
| PET CT               | Not required (preferred) | Not required                                           | As required                                 | As required                               |
| QOL questionnaires   | x                        | x                                                      | x (At 6 and 12 months)                      | -                                         |

### Treatment at the progression:

Isolated progression at existing or new sites will be evaluated for local ablative therapies including surgery, SBRT, or radiofrequency ablation in both the arms. For limited or widespread metastases, subsequent lines of chemotherapy or immunotherapy will be decided at the investigator's discretion depending upon PS at the time of progression. Symptomatic sites will be offered palliative RT as per the existing institutional policies. Follow up schedule after progression will be adjusted to match the existing schedules within  $\pm$  6 weeks to avoid duplication of visits.

### Quality assurance:

Strict adherence to quality assurance protocols will be ensured for patients undergoing SBRT or definitive RT in the experimental arm. Full quality assurance guidelines will be published separately.

**Ethics and dissemination:** The study is approved by the institutional ethics committee of Tata Memorial Hospital (TMH IRB project number – 3445). The study is registered prospectively

with Clinical Trials Registry – India, CTRI/2020/04/024761, dated April 21<sup>st</sup>, 2020. Written informed consent will be obtained from all the patients for study interventions, biomarkers and radiomics part of the study.

### **Confidentiality:**

Study participants' names and personal information will be held in strict confidence and will not be shared publicly. Participant details in case record forms, safety reports, and correspondence to IRB will be done with the study identification number and participant's initials. Study investigators will maintain a master list with the participant's identification details.

### **Data sharing statement**

Deidentified participant data from this study will not be shared publicly, however, the full protocol along with the primary analysis of the outcomes will be published in a peer reviewed indexed journal.

### **Discussion:**

Oligometastatic disease deserves attention owing to the increasing evidence from various retrospective and prospectively randomized studies. Two-phase II randomized studies in NSCLC patients have shown significant benefit in PFS (Table 4). Adequately powered well-conducted phase III RCT is needed to generate level I evidence to support the efficacy of local ablative therapies in OM NSCLC. There are two similar phase III RCT in progress for assessment of local ablative therapy in combination with systemic therapy (Table 5).

The SARON trial (NCT02417662) is a multicenter, randomized phase III trial being conducted in 30 hospitals in the United Kingdom and plans to recruit 340 patients with oligometastatic EGFR, ALK, and ROS1 mutation-negative NSCLC (1-3 sites of synchronous metastatic disease at least one of which must be extracranial). Patients will receive either standard systemic therapy only or standard systemic therapy plus radical radiotherapy or SBRT to their primary tumors (and mediastinal nodes where present) and SBRT/SRS to all metastatic sites. The primary end-point of the study is overall survival.

The OMEGA trial (NCT03827577) is a phase III randomized trial being conducted in Italy which proposes to recruit 195 patients with synchronous or metachronous oligometastatic NSCLC with up to 3 metastatic sites. The study will include both oncogene mutation-positive and negative patients and they will be randomized to receive either standard systemic therapy alone (platinum doublet chemotherapy or TKI or immunotherapy) or standard systemic therapy followed by SBRT, surgical resection or radiofrequency ablation (RFA). The primary endpoint of the study is overall survival.

Our institute sees approximately 2500 new lung cancer patients annually. The proposed study is a single-center study and will recruit patients with  $\leq 5$  OM sites after completion of initial planned standard systemic therapy. This study will also include patients who have been treated with palliative RT at presentation and if controlled at the time of randomization. The possibility of further ablative doses at those particular sites will be ascertained by the radiation oncologist. The study is currently awaiting funding from extramural grants and will start recruitment once funding is arranged.

**Table 4: Prospective published studies of local consolidative therapy in OM NSCLC**

| Author, year                         | Study design                  | No. of patients      | No. of sites | Intervention              | Med FU (months) | Inclusion                         | Median Outcomes in months         |
|--------------------------------------|-------------------------------|----------------------|--------------|---------------------------|-----------------|-----------------------------------|-----------------------------------|
| Gomez et al (NSCLC)[19]              | RCT – II<br>CRT Arm<br>No CRT | 25<br>24             | $\leq 3$     | LCT + MT Vs<br>MT/O alone | 38.8            | Synchronous#                      | PFS 14.4 Vs 4.4<br>OS 41.2 Vs 17  |
| Iyengar et al (NSCLC)[30]            | RCT - II                      | 14<br>15             | $\leq 5$     | SABR + MT<br>Vs MT alone  | 9.6             | Synchronous                       | PFS 9.7 vs 3.5                    |
| Palma et al (various primaries)[31]  | RCT - II                      | 66<br>33             | $\leq 5$     | SABR +SOC<br>vs SOC alone | 26              | Synchronous<br>or<br>metachronous | OS 41 Vs 28,                      |
| Sutera et al (various primaries)[28] | Phase II                      | 147<br>(lung-<br>32) | $\leq 5$     | SABR                      | 41.3            | Synchronous<br>or<br>metachronous | OS 42.3<br>(Lung OS –<br>26.8)    |
| Ruysscher et al (NSCLC)[32]          | Phase II                      | 40                   | $\leq 5$     | SABR                      | 27.7            | Synchronous                       | OS – 13.5                         |
| Petty et al (NSCLC) [29]             | Phase II                      | 29                   | $\leq 5$     | SBRT                      | 24.2            | Synchronous                       | OS – 28.4<br>PFS – 11.2           |
| Collen et al (NSCLC) [33]            | Phase II                      | 26                   | $\leq 5$     | SBRT                      | 16.4            |                                   | OS – 23<br>PFS – 11.2             |
| Arrieta et al (NSCLC) [34]           | Phase II                      | 37                   | $\leq 5$     | RCT                       | 32.5            | Synchronous#                      | OS – not<br>reached<br>PFS – 23.5 |

# includes oncogene mutation-positive patients

Abbreviations: RCT – randomized controlled trial, OM – oligometastases, NSCLC – non-small cell lung cancer, TNBC – triple-negative breast cancer, SMT – standard maintenance therapy, SBRT – stereotactic body radiation therapy, LAT – local ablative therapy, SOC – standard of care, LCRT – local consolidation radiation therapy, OS – Overall survival, PFS – progression-free survival

**Table 5: Ongoing Randomized Studies in Oligometastatic NSCLC**

|                              | <b>SARON</b>                             | <b>OMEGA</b>                     | <b>CORE</b>             | <b>PROMISE-005</b>          | <b>NRG LU 002</b>                          | <b>Current Study</b> |
|------------------------------|------------------------------------------|----------------------------------|-------------------------|-----------------------------|--------------------------------------------|----------------------|
| Trial ID                     | NCT02417662                              | NCT03827577                      | NCT02759783             | NCT03808337                 | NCT03137771                                | CTRI/2020/04/024761  |
| Country                      | UK                                       | Italy                            | UK                      | USA                         | Multicentric                               | India                |
| Trial Design                 | RCT III                                  | RCT III                          | RCT II/III              | RCT II                      | RCT II/III                                 | RCT III              |
| No. of OM sites              | ≤3                                       | ≤3                               | ≤3                      | ≤5                          | ≤3                                         | ≤5                   |
| Presentation                 | Synchronous at least 1 extracranial site | Synchronous or metachronous      | Metachronous            | Synchronous or metachronous | Synchronous or metachronous (extracranial) | Synchronous          |
| Primary Site                 | NSCLC                                    | NSCLC                            | Breast, Prostate, NSCLC | TNBC, NSCLC                 | NSCLC                                      | NSCLC                |
| Oncogene mutation            | Negative*                                | Negative and Positive            | --                      | Negative and Positive       | Negative                                   | Negative             |
| Target accrual               | 340                                      | 195                              | 245                     | 142                         | 300                                        | 206                  |
| Control Arm                  | SMT                                      | Systemic therapy                 | SOC                     | SOC                         | SMT                                        | SMT                  |
| Experimental Arm             | RT to primary and SBRT for OM            | Systemic therapy followed by LAT | SBRT followed by SOC    | SBRT plus SOC               | LCT + SMT                                  | LCRT + SMT           |
| Primary end point            | OS                                       | OS                               | PFS/OS                  | PFS                         | PFS/OS                                     | OS                   |
| Estimated year of completion | 2022                                     | 2022                             | 2024                    | 2022                        | 2022                                       | 2024                 |

\*Negative indicates for de-novo stage IV non-small cell lung cancer

Abbreviations: RCT – randomized controlled trial, OM – oligometastases, NSCLC – non-small cell lung cancer, TNBC – triple-negative breast cancer, SMT – standard maintenance therapy, SBRT – stereotactic body radiation therapy, LAT – local ablative therapy, SOC – standard of care, LCRT – local consolidation radiation therapy, OS – Overall survival, PFS – progression-free survival

1  
2  
3  
4  
5  
6  
7  
8  
9  
10  
11  
12  
13  
14  
15  
16  
17 **Author contributions:** Concept and design of the study – AT and JPA. The initial draft of  
18 Protocol – AT, JPA. The final draft of the protocol - AT, JPA, SS, NM, KP, VN, VP, NP, AJ,  
19 and SK. All authors read and approved the final protocol  
20

21  
22 **Funding:** The study is awaiting funds from intramural and extramural grants. Funding bodies  
23 will not have any role in study design modifications, data collection, and analysis of the  
24 study.  
25

26  
27 **Competing interests:** Dr. VN has received institutional research funding from Amgen,  
28 Sanofi India Ltd, Dr. Reddy's Laboratories Inc., Intas Pharmaceuticals, and Astra Zeneca  
29 Pharma India Ltd. All research grants have been paid to the institution. Dr. Kumar Prabhash  
30 has received research funding from Dr. Reddy's Laboratories Inc., Fresenius Kabi India Pvt.  
31 Ltd., Alkem Laboratories, Natco Pharma Ltd., BDR Pharmaceuticals Intl. Pvt. Ltd, and  
32 Roche Holding AG (all research grants paid to the institution and are unrelated to this study  
33 project). The rest of the authors declare that they have no competing interest in the proposed  
34 study protocol.  
35

36  
37 **Consent for publication:** Not applicable  
38

39 **Availability of data and materials:** Additional information on the protocol is available by  
40 contacting the corresponding author. There is no data reported in this manuscript.  
41

42 **Acknowledgments:** None  
43

#### 44 **Figure legends**

45  
46 Figure 1: Study schema  
47  
48  
49  
50  
51  
52  
53  
54  
55  
56  
57  
58  
59  
60

**References:**

- 1 Solomon BJ, Mok T, Kim D-W, *et al.* First-Line Crizotinib versus Chemotherapy in ALK -Positive Lung Cancer . *N Engl J Med* 2014;**371**:2167–77. doi:10.1056/nejmoa1408440
- 2 Soria J-C, Ohe Y, Vansteenkiste J, *et al.* Osimertinib in Untreated EGFR -Mutated Advanced Non–Small-Cell Lung Cancer . *N Engl J Med* 2017;**378**:113–25. doi:10.1056/nejmoa1713137
- 3 Rosell R, Carcereny E, Gervais R, *et al.* Erlotinib versus standard chemotherapy as first-line treatment for European patients with advanced EGFR mutation-positive non-small-cell lung cancer (EURTAC): A multicentre, open-label, randomised phase 3 trial. *Lancet Oncol* 2012;**13**:239–46. doi:10.1016/S1470-2045(11)70393-X
- 4 Patil VM, Noronha V, Joshi A, *et al.* Phase III study of gefitinib or pemetrexed with carboplatin in EGFR-mutated advanced lung adenocarcinoma. *ESMO Open* 2017;**2**:10–8. doi:10.1136/esmoopen-2017-000168
- 5 Reck M, Rodriguez-Abreu D, Robinson AG, *et al.* Pembrolizumab versus Chemotherapy for PD-L1-Positive Non-Small-Cell Lung Cancer. *N Engl J Med* 2016;**375**:1823–33. doi:10.1056/NEJMoa1606774
- 6 Mok TSK, Wu YL, Kudaba I, *et al.* Pembrolizumab versus chemotherapy for previously untreated, PD-L1-expressing, locally advanced or metastatic non-small-cell lung cancer (KEYNOTE-042): a randomised, open-label, controlled, phase 3 trial. *Lancet* 2019;**393**:1819–30. doi:10.1016/S0140-6736(18)32409-7
- 7 Ashworth AB, Senan S, Palma DA, *et al.* An individual patient data metaanalysis of outcomes and prognostic factors after treatment of oligometastatic non-small-cell lung cancer. *Clin Lung Cancer* 2014;**15**:346–55. doi:10.1016/j.clcc.2014.04.003
- 8 Van den Begin R, Engels B, Collen C, *et al.* The METABANK score: A clinical tool to predict survival after stereotactic radiotherapy for oligometastatic disease. *Radiother Oncol* 2019;**133**:113–9. doi:10.1016/j.radonc.2019.01.001
- 9 Hellman S, Weichselbaum RR. Oligometastases. *J. Clin. Oncol.* 1995;**13**:8–10. doi:10.1200/jco.1995.13.1.8
- 10 Weichselbaum RR, Hellman S. Oligometastases revisited. *Nat. Rev. Clin. Oncol.*

- 2011;**8**:378–82. doi:10.1038/nrclinonc.2011.44
- 11 Gomez DR, Tang C, Zhang J, *et al.* Local consolidative therapy vs. Maintenance therapy or observation for patients with oligometastatic non–small-cell lung cancer: Long-term results of a multi-institutional, phase II, randomized study. *J Clin Oncol* 2019;**37**:1558–65. doi:10.1200/JCO.19.00201
- 12 Dingemans AMC, Hendriks LEL, Berghmans T, *et al.* Definition of Synchronous Oligometastatic Non–Small Cell Lung Cancer—A Consensus Report. *J Thorac Oncol* 2019;**14**:2109–19. doi:10.1016/j.jtho.2019.07.025
- 13 Lievens Y, Guckenberger M, Gomez D, *et al.* Defining oligometastatic disease from a radiation oncology perspective: An ESTRO-ASTRO consensus document. *Radiother Oncol* 2020;**148**:157–66. doi:10.1016/j.radonc.2020.04.003
- 14 Rusthoven KE, Hammerman SF, Kavanagh BD, *et al.* Is there a role for consolidative stereotactic body radiation therapy following first-line systemic therapy for metastatic lung cancer? A patterns-of-failure analysis. *Acta Oncol (Madr)* 2009;**48**:578–83. doi:10.1080/02841860802662722
- 15 Patel SH, Rimmer A, Foster A, *et al.* Patterns of initial and intracranial failure in metastatic EGFR-mutant non-small cell lung cancer treated with erlotinib. *Lung Cancer* 2017;**108**:109–14. doi:10.1016/j.lungcan.2017.03.010
- 16 Al-Halabi H, Sayegh K, Digamurthy SR, *et al.* Pattern of failure analysis in metastatic EGFR-mutant lung cancer treated with tyrosine kinase inhibitors to identify candidates for consolidation stereotactic body radiation therapy. *J Thorac Oncol* 2015;**10**:1601–7. doi:10.1097/JTO.0000000000000648
- 17 Parikh RB, Cronin AM, Kozono DE, *et al.* Definitive primary therapy in patients presenting with oligometastatic non-small cell lung cancer. *Int J Radiat Oncol Biol Phys* 2014;**89**:880–7. doi:10.1016/j.ijrobp.2014.04.007
- 18 Xu Q, Wang Y, Liu H, *et al.* Treatment outcome for patients with primary NSCLC and synchronous solitary metastasis. *Clin Transl Oncol* 2013;**15**:802–9. doi:10.1007/s12094-013-1008-2
- 19 Gomez DR, Blumenschein GR, Lee JJ, *et al.* Local consolidative therapy versus maintenance therapy or observation for patients with oligometastatic non-small-cell



- 1  
2  
3 lung cancer without progression after first-line systemic therapy: a multicentre,  
4 randomised, controlled, phase 2 study. *Lancet Oncol* 2016;**17**:1672–82.  
5  
6 doi:10.1016/S1470-2045(16)30532-0  
7  
8
- 9 20 Nsclc LC, Elamin YY, Gomez DR, *et al.* Local Consolidation Therapy ( LCT ) After  
10 First Line Tyrosine Kinase Inhibitor ( TKI ) for Patients With EGFR Mutant  
11 Metastatic Non e small-cell. *Clin Lung Cancer* 2019;**20**:43–7.  
12  
13 doi:10.1016/j.clcc.2018.09.015  
14  
15
- 16 21 Wang X, Zeng M. First-line tyrosine kinase inhibitor with or without aggressive  
17 upfront local radiation therapy in patients with EGFRm oligometastatic non-small cell  
18 lung cancer: Interim results of a randomized phase III, open-label clinical trial  
19 (SINDAS) (NCT02893332). *J Clin Oncol* 2020;**38**:9508–9508.  
20  
21 doi:10.1200/jco.2020.38.15\_suppl.9508  
22  
23
- 24 22 Mak RH, Doran E, Muzikansky A, *et al.* Outcomes After Combined Modality Therapy  
25 for EGFR -Mutant and Wild-Type Locally Advanced NSCLC. *Oncologist*  
26  
27 2011;**16**:886–95. doi:10.1634/theoncologist.2011-0040  
28  
29
- 30 23 Cox BW, Spratt DE, Lovelock M, *et al.* International spine radiosurgery consortium  
31 consensus guidelines for target volume definition in spinal stereotactic radiosurgery.  
32  
33 *Int J Radiat Oncol Biol Phys* 2012;**83**:e597–605. doi:10.1016/j.ijrobp.2012.03.009  
34  
35
- 36 24 Dou TH, Coroller TP, van Griethuysen JJM, *et al.* Peritumoral radiomics features  
37 predict distant metastasis in locally advanced NSCLC. *PLoS One* 2018;**13**:1–15.  
38  
39 doi:10.1371/journal.pone.0206108  
40  
41
- 42 25 Aerts HJWL, Velazquez ER, Leijenaar RTH, *et al.* Decoding tumour phenotype by  
43 noninvasive imaging using a quantitative radiomics approach. *Nat Commun* 2014;**5**.  
44  
45 doi:10.1038/ncomms5006  
46  
47
- 48 26 Alix-Panabières C, Pantel K. Clinical applications of circulating tumor cells and  
49 circulating tumor DNA as liquid biopsy. *Cancer Discov.* 2016;**6**:479–91.  
50  
51 doi:10.1158/2159-8290.CD-15-1483  
52  
53
- 54 27 Lindsay CR, Faugeroux V, Michiels S, *et al.* A prospective examination of circulating  
55 tumor cell profiles in non-small-cell lung cancer molecular subgroups. *Ann Oncol Off*  
56  
57 *J Eur Soc Med Oncol* 2017;**28**:1523–31. doi:10.1093/annonc/mdx156  
58  
59  
60



- 1  
2  
3 28 Sutera P, Clump DA, Kalash R, *et al.* Initial Results of a Multicenter Phase 2 Trial of  
4 Stereotactic Ablative Radiation Therapy for Oligometastatic Cancer. *Radiat Oncol*  
5 *Biol* 2019;**103**:116–22. doi:10.1016/j.ijrobp.2018.08.027  
6  
7  
8  
9 29 Petty WJ, Urbanic JJ, Ahmed T, *et al.* Long-Term Outcomes of a Phase 2 Trial of  
10 Chemotherapy With Consolidative Radiation Therapy for Oligometastatic Non-Small  
11 Cell Lung Cancer. *Int J Radiat Oncol Biol Phys* 2018;**102**:527–35.  
12 doi:10.1016/j.ijrobp.2018.06.400  
13  
14  
15  
16 30 Iyengar P, Wardak Z, Gerber DE, *et al.* Consolidative radiotherapy for limited  
17 metastatic non-small-cell lung cancer: A phase 2 randomized clinical trial. *JAMA*  
18 *Oncol* 2018;**4**:1–4. doi:10.1001/jamaoncol.2017.3501  
19  
20  
21  
22 31 Palma DA, Olson R, Harrow S, *et al.* Stereotactic ablative radiotherapy versus  
23 standard of care palliative treatment in patients with oligometastatic cancers (SABR-  
24 COMET): a randomised, phase 2, open-label trial. *Lancet* 2019;**393**:2051–8.  
25 doi:10.1016/S0140-6736(18)32487-5  
26  
27  
28  
29  
30 32 De Ruyscher D, Wanders R, Hendriks LE, *et al.* Progression-Free Survival and  
31 Overall Survival Beyond 5 Years of NSCLC Patients With Synchronous  
32 Oligometastases Treated in a Prospective Phase II Trial (NCT 01282450). *J Thorac*  
33 *Oncol* 2018;**13**:1958–61. doi:10.1016/j.jtho.2018.07.098  
34  
35  
36  
37 33 Collen C, Christian N, Schallier D, *et al.* Phase II study of stereotactic body  
38 radiotherapy to primary tumor and metastatic locations in oligometastatic nonsmall-  
39 cell lung cancer patients. *Ann Oncol* 2014;**25**:1954–9. doi:10.1093/annonc/mdu370  
40  
41  
42  
43 34 Arrieta O, Barrón F, Maldonado F, *et al.* Radical consolidative treatment provides a  
44 clinical benefit and long-term survival in patients with synchronous oligometastatic  
45 non-small cell lung cancer: A phase II study. *Lung Cancer* 2019;**130**:67–75.  
46 doi:10.1016/j.lungcan.2019.02.006  
47  
48  
49  
50  
51  
52  
53  
54  
55  
56  
57  
58  
59  
60

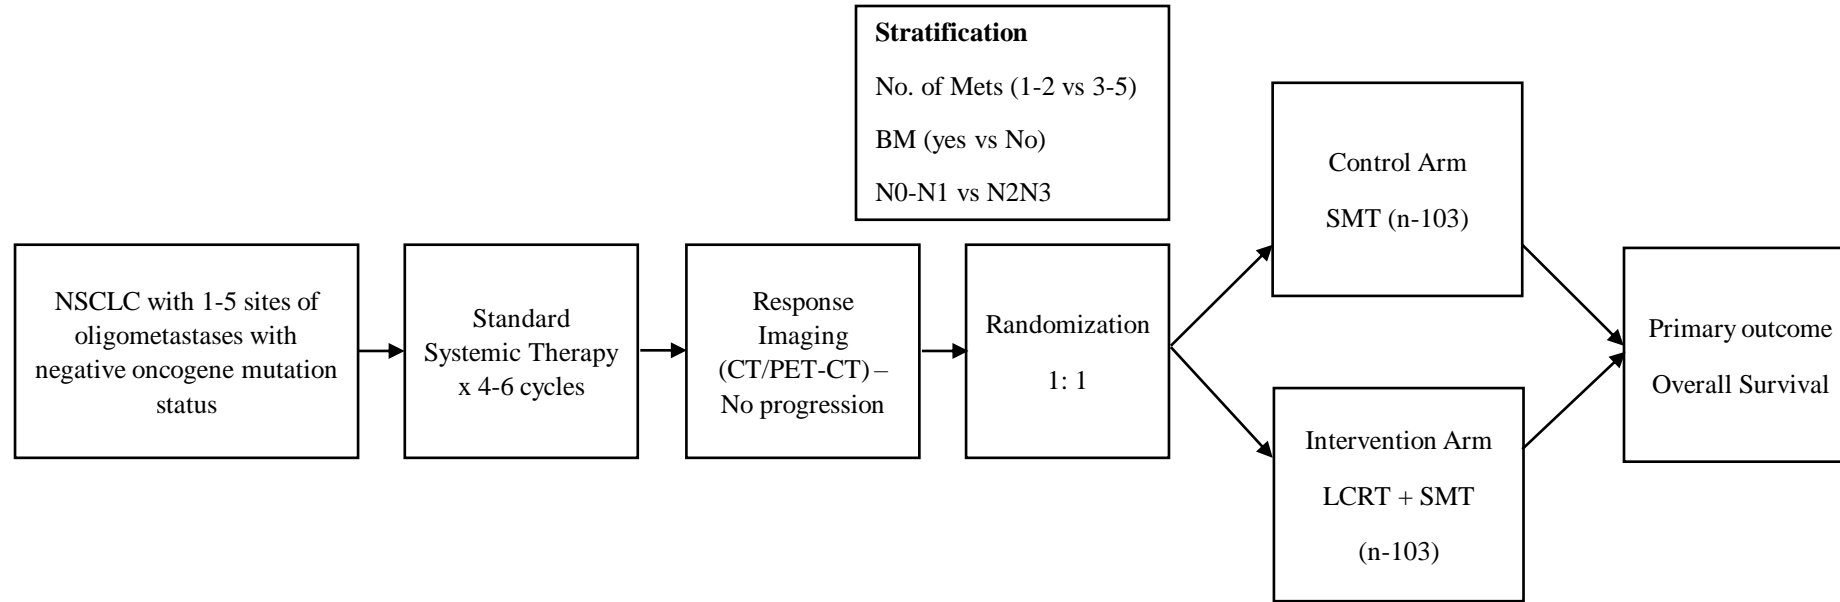

1  
2  
3  
4  
5  
6  
7  
8  
9  
10  
11  
12  
13  
14  
15  
16  
17  
18  
19  
20  
21  
22  
23  
24  
25  
26  
27  
28  
29  
30  
31  
32  
33  
34  
35  
36  
37  
38  
39  
40  
41

## **Informed Consent form**

### **Patient information sheet (PIS) and Informed Consent form (ICF) document**

#### **Standard maintenance therapy versus local consolidative radiation therapy and standard maintenance therapy in 1-5 sites of oligometastatic Non-small cell lung cancer (NSCLC): A Phase III Randomized Controlled Trial**

**Anil Tibdewal**, JP Agarwal, Kumar Prabhash, Naveen Mummudi, Vanita Noronha, Amit Joshi, Vijay Patil, Nilendu Purandare, Amit Janu, Abhishek Mahajan, Rajiv Kumar, Tapas Dora and Sadhana Kannan.

#### **1. Information to participate in the research project**

This document explains the study for which you are being considered as participant. Before consenting for the study, it is important that you read and understand the research questions, additional benefits, possible risks and study related procedures. Please feel free to approach the study team for clarifying any doubts for asking any question arising in relation to the study being proposed. You are also free to discuss with your family members of and before deciding about study participation. If you decide to participate in the study then you will have to sign the consent form. By signing the form, you are stating that you understand the information about the study, agree to the treatment procedure and willing to take part in the study.

Radiotherapy is a standard treatment for metastatic non-small cell lung cancer. In metastatic setting, radiotherapy is general given for palliative setting. However, even in metastatic setting, if the patients have limited number of metastatic sites usually less than 5 then this condition is called Oligometastases. In oligometastatic non-small cell lung cancer, patients after completion of systemic therapy has no evidence of progression then can be treated with radical radiotherapy to all the oligometastatic sites with curative intent. This therapy has resulted in better outcomes than maintenance systemic therapy alone (observation or more chemotherapy). In this study, we want to study the effects of local consolidative radiation therapy (LCRT) to all sites of oligometastatic disease in addition to standard maintenance therapy for its beneficial effects in improving the overall survival.

#### **2. Nature and purpose of this study**

Version No. 1.0, 04/01/2020

1  
2  
3 All consecutive oligometastatic NSCLC patients with 1-5 sites of metastases initially treated with 4-6  
4 cycles of systemic therapy will be screened for this study. Patients without evidence of progressive  
5 disease will be eligible for this study. The study will involve 300 patients. Patients willing for  
6 participation will be asked to sign the written informed consent form. Subsequently, these patients will  
7 be randomly allocated to receive maintenance therapy in the form of observation or further  
8 chemotherapy OR local consolidative radiation therapy to all initial sites of Oligometastases and  
9 standard maintenance therapy i.e half of the patients in the trial will continue to receive TKI alone and  
10 half will receive TKI + local consolidative Radiation therapy. The study team with the help of computers  
11 will do the treatment allocation after checking pertinent details regarding your disease condition. You  
12 have equal chance of receiving RT on not receiving it. In every other aspect, the treatment will be the  
13 same. If you are allocated to receive radiation, it will be planned within 2- 4 weeks after you agreed to  
14 participate in this study.  
15  
16  
17  
18  
19  
20  
21  
22  
23

### 24 **3. Study Methodology**

25  
26 Radiotherapy for metastatic non-small cell lung cancer is a relatively simple form of treatment delivered  
27 using beams of high-energy x ray. The planning process involved taking some measurement and a  
28 computed tomography CT scan in a position necessary for the treated sites and patient comfort. The  
29 planning session usually take 20 to 40 minutes. You will receive radiation to all the metastatic sites and  
30 primary disease. During treatment, you will be set up in the same position as you were during the  
31 planning session. Radiation is usually delivered daily Monday to Friday as outpatient. Each treatment  
32 session will take about 10 to 15 minutes depending upon the sites being treated.  
33  
34  
35  
36  
37

38 All participating patients will be followed up for at least five years. The first follow-up will be done at 3  
39 months post radiotherapy completion and then subsequently you will be seen at 3 monthly interval up  
40 to 2 years in the hospital clinic for a routine examination there after you will be reviewed every six  
41 monthly for 5 years or more.  
42  
43  
44

45 Another aspect that we would like to study the impact of local consolidative radiation treatment on your  
46 quality of life. For assessing this, you would be requested to fill in questionnaire that contains various  
47 items related to Physical, emotional and social wellbeing. You will be asked to fill this form before start  
48 of treatment and at regular intervals thereafter. Each questionnaire will take about 30 minutes to  
49 complete apart.  
50  
51  
52  
53  
54

### 55 **4. Biological and Radiomics substudy**

56  
57  
58 Version No. 1.0, 04/01/2020

1  
2  
3  
4  
5 Apart from the main study, we would like to do further research on your blood sample for circulating  
6 tumor cells & molecular studies and your radiologic images for Radiomics analysis. With your  
7 permission, we would like to preserve some parts of your cancerous tissue embedded in paraffin blocks  
8 at the pathological laboratory of Tata Memorial Hospital for 10 years. Your tissue would be stored in a  
9 way that it would not be identifiable and no one would be informed about specific findings related to  
10 you. Five ml of blood sample will be collected at baseline and at 3,6 and 12 months for the biological  
11 part of the study. Blood sample will be processed at a partner research laboratory in Pune. Other  
12 scientists or doctors may want to use this material to improve diagnosis and treatment of cancer after  
13 getting approval from the institutional ethics committee. If you agree to donate your biological material  
14 or let use of radiologic images for future studies, kindly give a separate consent for the same in addition  
15 to the main study. However, you are free to participate in the main study even if you decide not to  
16 donate the biological material.  
17  
18  
19  
20  
21  
22  
23  
24  
25

## 26 **5. Risks and side effects**

27  
28 Like any other treatment, RT caused side effects depending upon the area of the body being treated.  
29 The short-term general side effect in the form of redness, pigmentation or itching of the skin in the  
30 irradiated area, which is expected to subside within a month of completion of treatment. For example, if  
31 you are being treated for lung mass, RT may cause inflammation of the lung causing dry cough,  
32 shortness of breath and chest wall pain. However, these side effects are minimal by careful planning and  
33 using modern RT techniques. For further questions on side effects relating to specific sites, please  
34 consult the study team doctors. For any unforeseen radiation induced complications, patients will be  
35 managed at Tata Memorial hospital and treatment cost will be borne by the study team.  
36  
37  
38  
39  
40  
41  
42  
43  
44

## 45 **6. Costs**

46  
47 The study protocol will cover the cost of MRI Brain and you do not have to pay for it. You are not  
48 expected to pay for the radiation if you are allocated to receive RT. However, you will have to bear the  
49 cost of systemic therapy drugs, which you were previously taking before participating in this study and  
50 routine tests/procedure considered standard for staging, treatment and follow up. Thus, the cost of  
51 your standard treatment as well as the cost of managing any complication directly or indirectly  
52 attributable to this standard treatment would have to be borne by you or your caregivers.  
53  
54  
55  
56  
57

58 Version No. 1.0, 04/01/2020

## 7. Benefits

There are no direct monetary or financial benefits for participation in this study. We do not anticipate that any new information gained during the course of the study will benefit you directly. Many of the most effective treatments used today are the results of clinical trials done in the past. However, irrespective of your participation in the trial you will receive high standards of care. Moreover, close contact with the study team will be beneficial. Information from this study will improve our knowledge of treating non-small cell lung cancer with limited metastatic disease especially the benefits of RT.

## 8. Confidentiality

All information obtained during the study will be held in strict confidence. You will be identified with study number only. No names or identifying information will be used in images for any publication or presentation. Only the doctors and associates working on this study will have access to your medical charts in order to collect information on your treatment and the outcomes thereof. They will require access to your medical charts during your treatment and up to 5 years following your treatment. If you withdraw early from the study, no further collection of information from your medical charts will take place. However, information collected up to the point of withdrawal would still be used. The information in the study record will be kept confidential and the clinical chart will be kept in the Clinical Research secretariat (CRS) at TMC. Data will be stored securely and will be made available only to persons conducting the study. No reference will be made in oral or written reports, which would link you to the study.

## 9. Compensation

In the event of an injury occurring to the clinical trial subject, related to the intervention arm, such subject should be provided free medical management as long as required. In the event of a study related injury and death, compensation will be provided as per the institutional policy.

## 10. Reimbursement

You will not receive any reimbursement for the routine tests/procedures and the standard treatment that is being offered to you in the study.

Version No. 1.0, 04/01/2020

## 11. Contact

If you have any questions regarding the study or the procedures at any time, you may contact the Principal investigator on this study, Dr. Anil Tibdewal, Room number 306 Homi Bhabha Block 3<sup>rd</sup> floor, Radiation Oncology OPD (Tel 91-22-2417 7000, Extension 6315 at Tata Memorial Hospital or Room no 1130 (Tel 24177030) at Tata Memorial Hospital between 9:30 a.m. to 5:30 p.m. In case you have any question regarding your rights as a participant or wish to clarify certain issues from a non-investigator on this study, you can contact Dr. Umesh Mahantshetty or Dr. Girish Chinnaswamy, Member Secretary IEC, Tata Memorial Hospital, Parel, Mumbai on 91-22-24177262.

## 12. Participation

Your participation in this study is completely voluntary. You are free to refuse participation, or to leave the study at any time. You will not be penalized or lose any benefit to which you are otherwise entitled. If you withdraw from the study prior to its completion you will receive the usual standard of care for the disease and your non- participation will not have any adverse effect on your subsequent medical treatment or relationship with the treating physician. Additionally, we may discontinue the study at any time without your consent for safety or Administrative reasons.

## Informed Consent form (Main study)

**Study Title: Standard maintenance therapy versus local consolidative radiation therapy and standard maintenance therapy in 1-5 sites of oligometastatic Non-small cell lung cancer (NSCLC): A Phase III Randomized Controlled Trial**

Study number: \_\_\_\_\_

Subject's Name: \_\_\_\_\_

Subject's Initials: \_\_\_\_\_

Date of birth/Age: \_\_\_\_\_

1. I confirm that I have read and understood the information sheet dated \_\_\_\_\_ for the above study and have had the opportunity to ask questions.
2. I understand that my participation in the study is voluntary and that I am free to withdraw at any time, without giving any reason, without my medical care or legal rights being affected.
3. I understand that the sponsor of the research study, others working on the sponsor's behalf, IEC and the regulatory authorities will not need my permission to look at my health records both in respect of the current study and any further research that may be conducted in relation to it, even if I withdraw from this trial. I agree to this access. However, I understand that my identity will not be revealed in any information released to third parties or published.
4. I agree not to restrict the use of any data or results that arise from this study provided such a use is only for scientific purpose(s).
5. I agree to take part in the above study.

I have read the above information and agreed to participate in this study. I have received a copy of this form.



|                                                                                                                                                                                                                                    |  |
|------------------------------------------------------------------------------------------------------------------------------------------------------------------------------------------------------------------------------------|--|
| Participant's name (print)                                                                                                                                                                                                         |  |
| Participant's signature or thumb impression and date                                                                                                                                                                               |  |
| Address:<br>Qualification:<br>Occupation: Student/Self-employed/service/Housewife/others (please tick as appropriate) and attach supporting documentation<br>Annual Income of the subject (please attach supporting documentation) |  |
| Phone Nos:                                                                                                                                                                                                                         |  |
| Legal acceptable representative name                                                                                                                                                                                               |  |
| Legal acceptable representative signature or thumb impression and date                                                                                                                                                             |  |
| Address (Capital letters)<br>Phone numbers                                                                                                                                                                                         |  |
| Impartial witness's name                                                                                                                                                                                                           |  |
| Impartial witness's signature and date                                                                                                                                                                                             |  |
| Address (capital letters)<br>Phone numbers                                                                                                                                                                                         |  |
| Name of PI or Co-PI/Co-I                                                                                                                                                                                                           |  |
| PI or Co-PI/Co-I signature and date                                                                                                                                                                                                |  |

**Informed Consent form**

**Study Title: Standard maintenance therapy versus local consolidative radiation therapy and standard maintenance therapy in 1-5 sites of oligometastatic Non-small cell lung cancer (NSCLC): A Phase III**

**Randomized Controlled Trial**

I hereby freely give my consent to take part in the BIOLOGICAL and Radiomics sub study for which I wish to donate the following materials/agree to let use of my radiology scan images.

Blood

Tumor tissue

Radiology Images

|                                                    |  |
|----------------------------------------------------|--|
| Participant's name (print)                         |  |
| Participant's signature and date                   |  |
| Phone Nos:                                         |  |
| Legal acceptable representative name               |  |
| Legal acceptable representative signature and date |  |
| Address (Capital letters)<br>Phone numbers         |  |
| Impartial witness's name                           |  |
| Impartial witness's signature and date             |  |
| Address (capital letters)<br>Phone numbers         |  |
| Name of PI or Co-PI/Co-I                           |  |

Version No. 1.0, 04/01/2020

1  
2  
3  
4  
5  
6  
7  
8  
9  
10  
11  
12  
13  
14  
15  
16  
17  
18  
19  
20  
21  
22  
23  
24  
25  
26  
27  
28  
29  
30  
31  
32  
33  
34  
35  
36  
37  
38  
39  
40  
41  
42  
43  
44  
45  
46  
47  
48  
49  
50  
51  
52  
53  
54  
55  
56  
57  
58  
59  
60

|                                     |  |
|-------------------------------------|--|
| PI or Co-PI/Co-I signature and date |  |
|-------------------------------------|--|

For peer review only
